# Supplementary material for: A genetic-epigenetic interplay at 1q21.1 locus underlies CHD1L-mediated vulnerability to primary progressive multiple sclerosis
Source: PubMed Central journal article supplement (PMC11289459; doi:10.1038/s41467-024-50794-z), 2024-07-30
Supplement: 41467_2024_50794_MOESM1_ESM.pdf [file 41467_2024_50794_MOESM1_ESM.pdf]

# **A genetic-epigenetic interplay at 1q21.1 locus underlies *CHD1L*-mediated vulnerability to Primary Progressive Multiple Sclerosis**

**Supplementary Figures**

**Supplementary Methods**

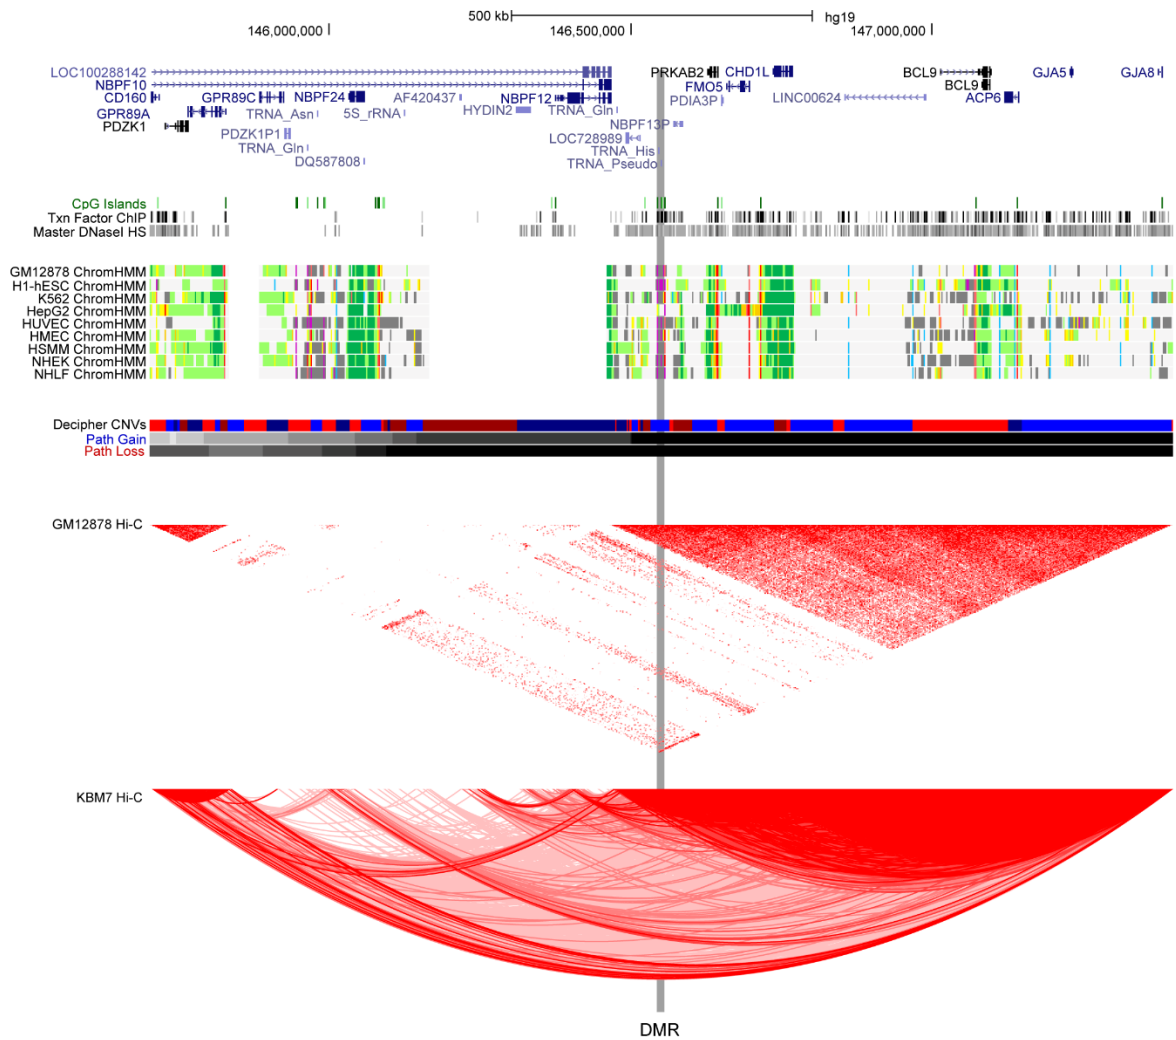

**Supplementary Fig. 1. Chromatin chromosome interaction (Hi-C) annotation of the locus from Roadmap.** The Hi-C annotation showing chromatin folding data from in-situ experiments on several cell lines<sup>1</sup> displayed by UCSC genome browser. The data indicate how many interactions were detected between regions of the genome. Two cell lines were chosen as examples: the color shade in the triangle mode shows the proximity score for two genomic regions, intersection was further depicted using arcs drawn between the centers of interacting regions. A high score between two regions suggests that they are probably in close proximity in 3D space within the nucleus of a cell.



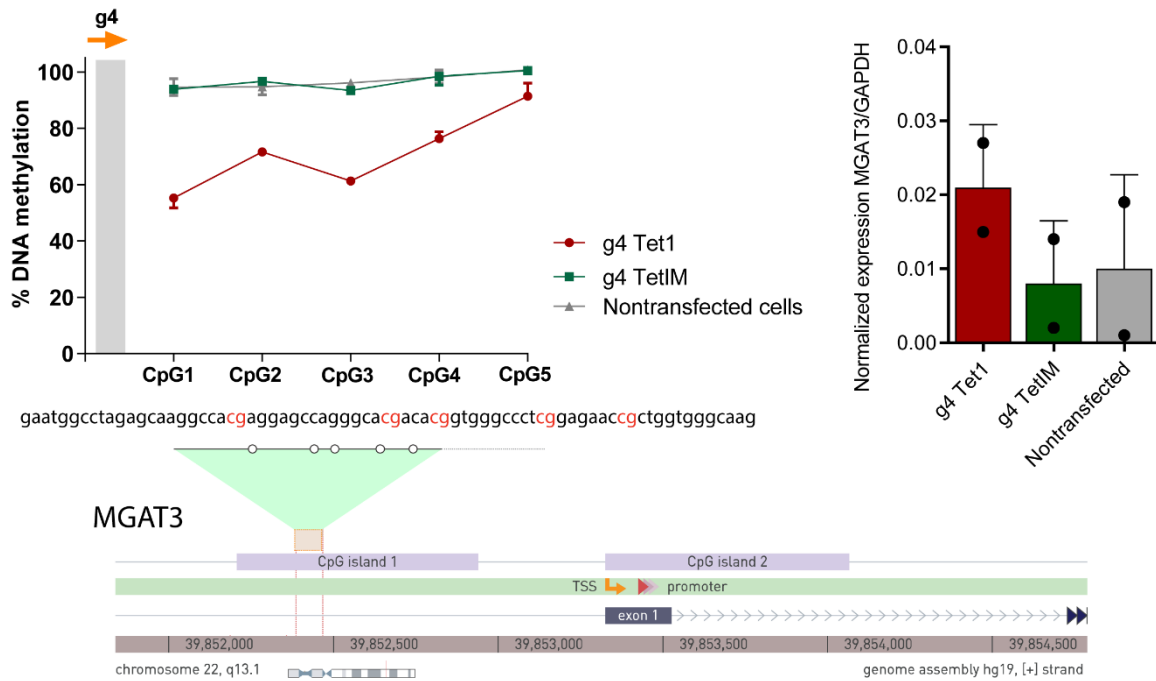

**Supplementary Fig. 3. Validation of the editing efficiency of dCas9-TET1 constructs** by targeting 5 CpGs in the *MGAT3* gene promoter. The methylation decreased 10-50% in different CpGs, resulting in no significant changes in *MGAT3* gene expression (Kruskal-Wallis test,  $P > 0.05 \pm SD$ ), as previously described<sup>4</sup>.

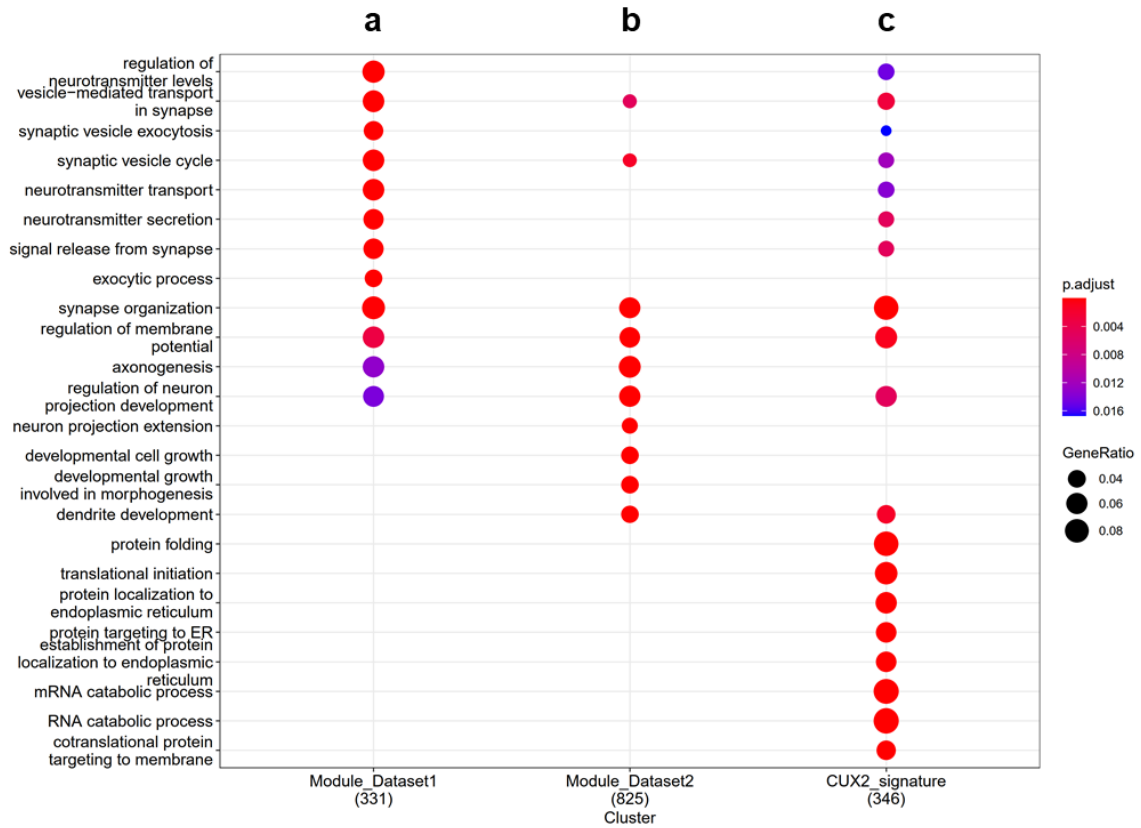

**Supplementary Fig. 4. Enrichment dot plot showing Gene Ontology (GO): Biological processes for a. *CHD1L* module from our study. b. Validated module from snRNA-seq data (PRJNA544731) c. gene set for CUX2+ neuronal gene signature.** The size of the dot corresponds to the gene ratio overlapping with the pathway and the color of the dot represents significance of the FDR p-value of the enrichment.

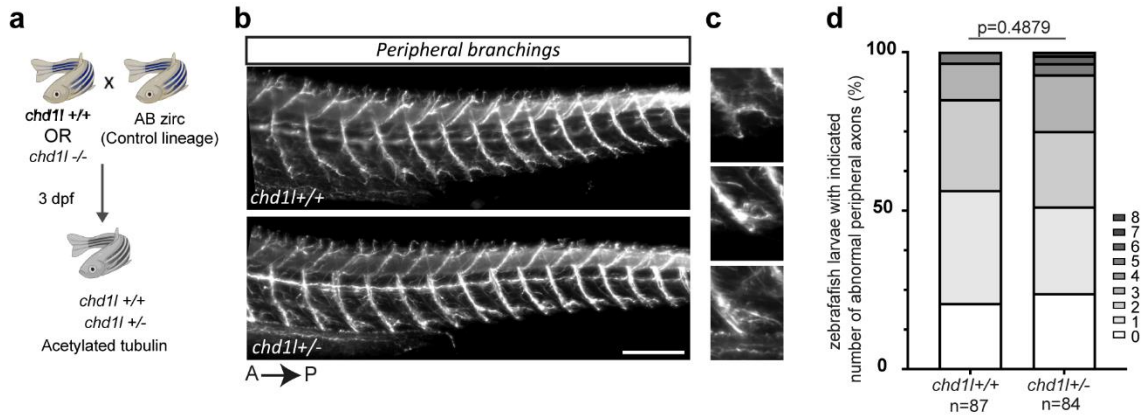

**Supplementary Fig. 5. Effect of *chd1l* loss on peripheral axonal abnormalities in 3 dpf zebrafish larvae.** **a.** Schematic of the experimental design. **b.** Lateral view of control *chd1l*+/+ and *chd1l*+/- larvae stained with acetylated tubulin at 3 dpf. Scale bar: 100  $\mu$ m. **c.** Examples of axonal projections: normal branching (top), ectopic branching (middle) and reduced/absent branching (bottom) used for qualitative quantification of peripheral axons. **d.** Stacked barplot of the percentage of larvae with axonal projection defects in peripheral neurons. Number of abnormal projections were counted across eight metamers in control and *chd1l*+/- larvae. Data are expressed as percentage of larvae for N = 3 replicates for each genotype. Fischer's exact test is performed for p-value. A, antero; P, posterior, dpf: days post-fertilization. Source data are provided as a Source Data file.

**>1q21.1 DMR\_1st (CpG 1&2 in 450K) [285 bps]**

GGGATGTTAAGGTTTGGAGTTTTTATGATATTCGGGGTGTTCGATTTTATTTTGGGAGTTTTT  
TCGTTTTTGTGGTTTTTGGTTATTTAGTGC GCGGTTTTGGTTCGGTGATTCGTTATTGTTTT  
TTATGCGTTGTCGTTTTATAAAGGCGTATTTTAGGTCGGTGGTTAGGTTTTGTTCCGGACGTT  
GTAATTGGTTTCGGGATTTGTGTTTTTGGTGAGTTTAGCGGAGTGTGGGTGCGTCGTTTGC  
GTGTTTTTTTTTGGAGAAAGGAGGGAGGGAA

**>1q21.1 DMR\_2st (CpG 3 in 450K) [265 bps]**

GTTGTAATTGGTTTCGGGATTTGTGTTTTTGGTGAGTTTAGCGGAGTGTGGGTGCGTCGTT  
TGC GTGTTTTTTTTTGGAGAAAGGAGGGAGGGAACGGTTTTGTGAGACGATTTTAGGAGCG  
ATTAGCGATTTTTATAAGTTTTAAGTTTTTAGCGTATAGGGAAATTGTTATTTATAGGGAAA  
TTGTCGTTTTAGTGTAAGAAGGTTGAAAAGTTTTTTTTGTGTTTTTTTTGGTGGTTGGTGGT  
TAGAATTTAGCGT

**>1q21.1 DMR\_3st (CpG 4 in 450K) [131 bps]**

GGTAATTTTTGGTGGGTTATTTTTATGATATAGCGTTTTTATTTATTTTCGTGTTTGTATTTCG  
TATAAGCGTTTTAGAGAGCGATTGAGCGTTTCGTTTAGGTGTATATCGTTGTGTAGAGATGT  
TAG

**>MGAT3 [118 bps]**

GTTTTTGAGTTTTGAGAGGAATGGTTTAGAGTAAGGTTACGAGGAGTTAGGGTACGATACGG  
TGGTTTTCGGAGAATCGTTGGTGGGTAAGTGGTAGGAGAGTAGGTTTAAGAGGGT

**Supplementary Fig. 6. Bisulfite amplicons for the pyrosequencing assays.** CpG sites are highlighted in yellow. Sequencing primers are underlined.

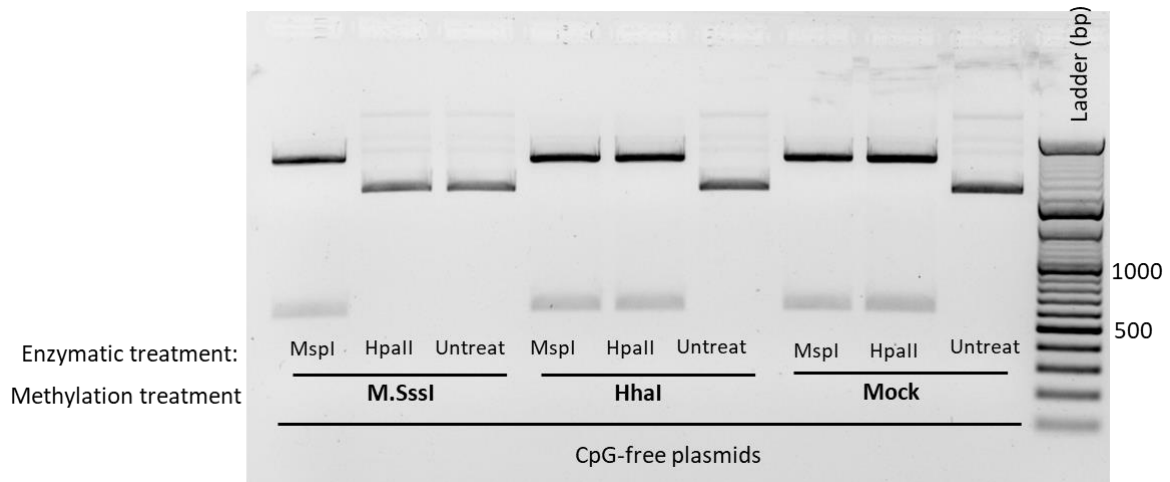

**Supplementary Fig. 7. Methylation of 1q21.1 DMR vector used for in-vitro DNA methylation assay.** Representative gel of completely methylated (57 CpGs) by *M.SssI* or partially methylated (7 CpGs residing in the GCGC sequence) by *HhaI* methyltransferases 1q21.1 DMR containing vector and empty constructs, treated with the methyl-insensitive *MspI* or the methyl-sensitive *HpaII*. The mock control was treated equally but in absence of any methyltransferases and correspond to unmethylated inserts.



**P3-dCas9-Tet1-GFP-Puro (Addgene #190728)**

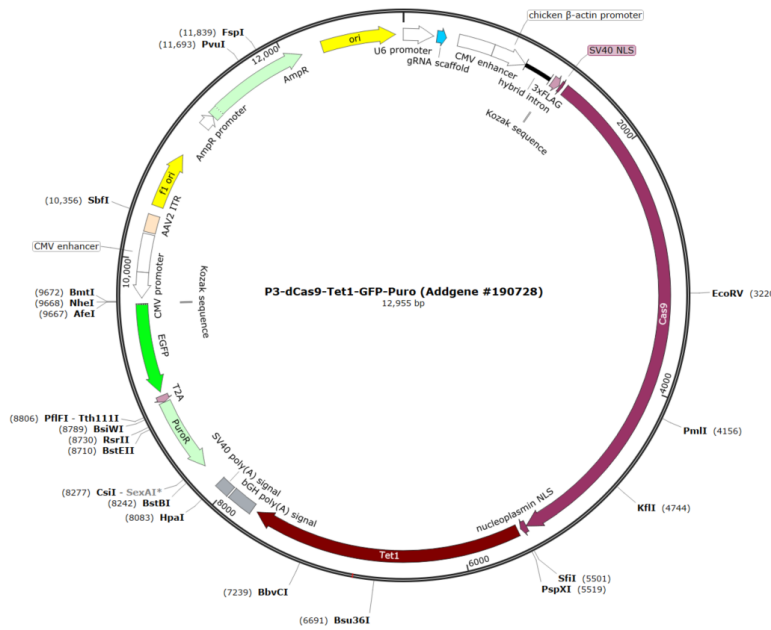

gagggcctatttcccatgattcctcatattgcatatacgatacaaggctgttagagagataattggaattaattgactgtaaacacaag  
atattagtacaaaatcgtgacgtagaagaataattcttgggtagttgcagtttaaaattatgttttaaaatggactatcatatgctacc  
gtaactgaaagtatttccgatttctggcfttatatactgtggaaggacgaacaccgggtctcgagaagacctgttttagagctagaaa  
tagcaaggtaaaataaggctagtcggttatcaactgaaaaagtgccaccgagctcggtgctttttgttttagagctagaatagcaagttaa  
aataaggctagtcggttttagcgcgctgcgcaattctgcagacaaatggctctagaggtaccggtacataactacggttaaattggccg  
cctggctgaccgccaacgacccccgccattgacgtcaatagtaacgccaatagggactttccattgacgtcaatgggtggatgattta  
cgttaaactgcccacttggcagtagcatcaagtgtatcatatgccaagtacgccccctattgacgtcaatgacggtaaaatggccccctgg  
cattgtgccagtagcatgacctatgggacttctacttggcagtagcatctacgtattagtcacgctattaccatggcgaggtgagcccca  
cgttctgcttcaactctccccatctccccccctccccaccccccaatttatttttttttaattttttgtgcagcgatggggcgggggg  
ggggggggggcgcgccaggcgggggcgggggcgggggcgagggcgggggcgggggcgagggcgagaggtgcccggcgagcca  
atcagagcggcgcgctccgaaagtctttatggcagggcgggcgggcgccctataaaaagcgaagcgcgcgggcgggcg  
ggagtcgctgcgcgctgcttgcggcgtgcccgcctccgcccggctcgcgcccggctctgactgaccggttactccc  
acaggtgagcggcgggacggccttctcctcgggctgtaattagctgagcaagaggttaagggatggtggtggtgggg  
tattaatgttaattacctggagcacctgctgaaatcattttttaggttgaccgggtccaccatggactataaggaccagcagggag  
actacaaggatcatgatattgattacaaagacgatgacgataagatggcccaagaagaagcgggaaggtcggtatccacggagtc  
ccagcagccgacaagaagtacagcatcggcctggcatcggcaccactctgtgggctgggctgacaccgacgagtagaaggt  
gcccagcaagaattcaaggtgctgggcaacaccgaccggcacagcatcaagaagaacctgatcggagccctgctgttcgacagc  
ggcgaacagccgagccacccggctgaagagaaccgccaagaagaagatacaccagacggaagaaccggatctgctatctgca  
agagatctcagcaacgagatggccaaggtggacgacagcttctccacagactggaagagctctcctggtggaagaggataagaa  
gcacgagcggcaccatctcggcaacatcgtggacgaggtggcctaccacgagaagtaccacacatctaccacctgagaaaga  
aactggtggacagcaccgacaaggccgacctgcggtgatctatctggcctggccacatgatcaagttccggggccacttctgac  
gagggcgacctgaacccgacaacagcgcagctggacaagctgttcatccagctggtgcagacctacaaccagctgttcgaggaaaa  
ccccatcaacgccagcggcgtggacgccaaggccatcctgtctgccagactgagcaagagcagacggctggaaaatctgatcgcc  
agctgcccggcgagaagaagaatggcctgttcggcaacctgattgcctgagcctggcctgaccccaactcaagagcaactcga  
cctggccgaggtgccaactgcagctgagcaaggacacctacgacgacgacctggacaacctgctggccagatcggcgaccag  
tacgccgacctgttctgcccgaagaacctgtccgacgccatcctgctgagcgacatcctgagagtgaaacaccgagatccaagg  
ccccctgagcgcctctatgatcaagagatagcagcagcaccaccaggacctgacctgtgaaagctctcgtgcccagcagctgc  
ctgagaagtacaaagagatcttctgaccagagcaagaacggctacgcccgtacattgacggcggagccagccaggaagagttct  
acaagttcatagccccatcctgaaaagatggacggcaccgaggaactgctcgtgaagctgaacagagagggacctgctgaggaa  
gcagcggacctcgacaaccggcagcatccccaccagatccacctgggagagctgcacgacctctgcccggcaggaagatttta  
cccattcctgaaggacaaccgggaaaagatcgagaagatcctgacctccctacacgtgggcccctctggccaggggaaa  
cagcagattcgcctgtagaccagaaagagcggagaaaccatccccctggaactcagaggaagtggtggacaagggcgctccg

cccagagcttcatcgagcggatgaccaacttcgataagaacctgcccacgagaaggtgctgcccagcacagcctgctgtacgagt  
acttcaccgtgtataacgagctgaccaagtgaatacgtgaccgagggaaatgagaaagcccgccttctgagcggcgagcagaaa  
aaggccatcgtggacctgctgttcaagaccaaccggaaagtaccgtgaagcagctgaaagaggactacttcaagaaaatcgagt  
cttcgactccgtggaatctccggcgtggaagatcgttcaacgcctccctgggcacataccacgatctgctgaaaattatcaaggaca  
aggacttctggacaatgaggaaaacgaggacattctggaagatatcgtgctgacctgacactgtttgaggacagagagatgatcga  
ggaacggctgaaaacctatgccacctgttcgacgacaaaagtgatgaagcagctgaagcggcgagatacaccggctggggcagg  
ctgagccggaagctgatcaacggcatccgggacaagcagtcgggcaagacaatcctggatttctgaagtccgacggctcgccaac  
agaaactcatcgagctgatccacgacgacgcctgacctttaaagaggacatccagaagcccagggtgctgggcccaggcgatag  
cctgcacgagcacattgccaatctggccggcagccccgccattaagaaggcatcctgcagacagtgaaaggtggtggacgagctgt  
gaaagtgatgggcccggcacaagcccgagaacatcgtgatcgaatggccagagagaaccagaccaccagaagggacagaaag  
aacagccgagagagaatgaagcggatcgaaggggatcaaaagagctgggagccagatcctgaaagaacaccccgtggaaaa  
caccagctgcagaacgagaagctgtacctgtactcctgcagaatgggggggatattgactggaccaggaactggacatcaaccg  
gctgtccgactacgatgtggacgctatcgtgcctcagagctttctgaaggacgactccatgcacaacaaggtgctgaccagaagcgc  
aagaaccggggcaagagcagacaacgtgcctccgaagaggtcgtgaagaagatgaagaactactggcgcagctgctgaacgcc  
aagctgattaccagagaaaagttcgacaatctgaccaagccgagagagggcggcctgagcgaactggataaggccggctcatca  
gagacagctggtgaaacccggcagatcacaagcagctggcacagatcctggactcccggatgaactaagtacgacgagaat  
gacaagctgactccgggaagtgaaagtgtaccctgaagtcaagctggtgtccgattccgggaaggatttccagtttacaagtgcg  
gagacaacaactaccaccacgcccacgacgctcactgacggcctgctgggaaccgcccctgatcaaaaactcaactaagctgga  
aagcaggtcgtgactcggcactacaaggtgtacgagtcggaagatgatcggcaagagcagcaggaatcggcaaggtacc  
gccaagtacttctctacagcaacatcatgaacttttcaagaccgagattaccctggccaacggcgagatccgggaagcggcctctgatc  
gagacaacccggcaaacccgggagatcgtgtgggataaggccgggattttgcccactgctggaaagtgtgagatgccccaaatg  
gaatatcgtgaaaaagaccgaggtgcagacaggcggctcagcaaaagtctatcctgcccagaggaacagcgataagctgatc  
ccagaagaaggactgggacctagaaggtacggcggcttcgacagccccaccgtggcctattctgtgctggtggtggccaaagtgg  
aaaaggcaagtccaagaaactgaaggtgtgaaagagctgctgggatcaccatcatggaagaagcagcttcgagaagaatcc  
catcgactttctggaagccaagggtacaaagaagtgaaaaaggacctgatcaagctgcctaagtactccctgttcgagctggaa  
aacggccggaagagaatgctggcctctcggcggaactgcagaagggaaacgaactggcctgcctccaaatattgaaactcctg  
tacctggccagccactatgagaagctgaaggctccccgaggataatgagcagaaacagctgtttggaacagcacaagcactac  
ctggacgagatcatcgagcagatcagcgagttctcaagagatgatcctggcgacgctaacttgacaaaagtgtctccgctaca  
acaagcaccgggataagcccacagagagcaggccgagaatatcatccactgtttaccctgaccaatctgggagcccctcggcctt  
caagtactttgacaccaccatcgaccggaagaggtacaccagcacaagaggtgctggacgccaccctgatccaccagagcatca  
ccggcctgtacgagacacggatcgacctgtcagctgggagggcagacaaaaggccggcgccacgaaaaaggccggacagggc  
aaaaagaaaaagctcagggcgagggcgggagcggatccctgcccactgcagctgtctgatcgagttatacaaaaagacaaag  
gcccattatatacacacttggggcaggaacaggtgtgctgtcagggaaatcatggagaataggtatggtcaaaaaggaaacgc  
aataaggatagaaatagtagttacaccgtaaaagaagggaaaagctctcatgggtgtcaattgtaagtgggtttaaagaagaagc  
agtgatgaagaaaaagttcttttggcggcagcgtacagggccaccactgtccaactgctgtgatggtggtgctcatatggtgtggga  
tggcatccctctccaatggcggaccggctatacacagagctcacagagaatctaaagtatacaatgggaccctaccgacagaag  
atgaccctcaatgaaaatcgtacctgtacatgcaaggaattgatccagagactgtggagcttattcttttggctgttcagatgt  
actttaatggctgaagttgtagaagcccaagccccagaagattagaattgatccaagctcctctacatgaaaaaacctgaaga  
taacttacagagtttgctacacgattagctccaattataagcagtagtctccagtagcttaccaaaatcaggtggaatatgaaaatgtg  
ccgagaatgtcggctggcagcaaggaaggtcagccctctctgggctcactgctgctgacttctgtctatccccacaggacat  
tcacaacatgaataatggaagcactgtggtttgacttaactcgagaagataaccgctcttgggtgttattcctcaagatgagcagctcc  
atgtgtactctttataagcttccagacacagatgagtttgctccaaggaaggaatggaagcaagatcaaatctggggccatcgagg  
tctggcaccggcgcaaaaaaagaacgtgttactcagcctgttccccgttctggaaagaaggggtcgtcgatgatgacagaggtt  
cttgcacataagataagggcagtggaagaaacatttccccgaatcaagcggaaagaataactcaacaacaacaacaacagta  
agccttctgactgccaaccttagggagtaacactgagaccgtgcaacctgaagtaaaaagtgaaccgaacccccattttatcttaaaa  
agttcagacaacactaaaacttattcgtgatgccatccgctcctcaccagtgaaagaggcatctccaggcttctctgtcccccaag  
actgctcagccacaccagctccactgaagaatgacgcaacagcctcatcggggtttcagaaagaagcagcactccccactgtacga  
tgccctgggtgactcagtggtccaatgctgcagctgctgatggccctggcatttcacagctggcgaagtggctcctctccccaccctg  
tctgctctgtgatggagcccctattaattctgagccttccactgggtgactgagccgctaacgcctcatagccaaaccaccagcctc  
cttctcactctcctcaagacctgctctctccaatggaagaagatgagcagcattctgaagcagatgagcctccatcagacgaacc  
cctatctgatgaccctgtcactgctgaggagaaattgccccacattgatgattggtcagacagtgagcacatcttttggatgcaa  
atattggtgggtggccatgcacctgctcagggctcgggtttgattgagtggtgcccggcgagagctgcacgctaccactcctgtgagca  
ccccaccgtaatcatcaacccgctctccctgtctttaccagcacaacaaactaaataagccccacatggtttgactaaacaa  
gattaagttgaggtaaagaagctaaagaataagaaaatgaaggcctcagagcaaaaagaccaggcagctaatgaaggtccagaa  
cagtcctctgaagtaaatgaattgaacaaattcctctataaagcattaacattaacccatgacaatgtgtcaccgtgtcccttatgctc  
tcacacacgttgcggggccctataaccattgggtctgagaattcaatttaactagagctcgtgatcagcctcagctgtgctttagttgc

cagccatctgttgttccccctccccgtgccttcttgaccctggaaggtgccactcccactgtccttcttaataaaatgaggaaattgcat  
cgcattgtctgagtaggtgtcattctattctggggggtgggggtggggcaggacagcaagggggaggattgggaagagaatagcaggc  
atgctggggagcggcccgcgtaagatacattgatgagttggacaaaccacaactagaatgcagtgaaaaaaatgctttatttgtga  
aattgtgatctattgctttatttgaaccattataagctgaataaacaagtaacaacaacaattgcattcatttatgtttcaggttcagggg  
gaggtgtgggaggtttttaaagcaagtaaacctctacaatgtggtatggctgattatgatcagttatctagatccggtggatccccgggc  
ccgcggtaccgtcactgcagaattcgaagcttcaggcaccgggctgcgggcatgcaccaggtgcgcggtccttcgggcacctcga  
cgtcggcggtgacggtgaagccgagccgctcgtagaaggggaggttggggcgcgagggtctccaggaaggcgggcaccccg  
cgctcggccgctccactccggggagcagcagcgctgcccagacccttgccctggtggtcggcgagacgcccagcgtggtg  
aggaaccacgcggtctctgggcccgtgcccgcaggaggcctccatctgtgctgcgcccagccgggaaccgctcaactcg  
gcatgcccgggcatctcggcgaacaccgccccgctcagcctcggcggtggtccagaccgcccagcggcgccgtcgtcc  
gagaccacaccttgcgatgtcagcccagcgcggtgaggaagagttcttcagctcgggtgaccgctcagatgtggcggtccggat  
cgacggtgtggcgctggcgggtagtcggcgaaacggcgggcgaggggtgcgtacggccctggggagctcgtcgggggtggcgag  
gcgaccgtgggcttactcggcattggccaggattcctcagcgtcaccgcatgttagcagacttctctgcccagaagctttag  
ctcgagatctgagtcggactgtacagctcgtccatgccagagtgatcccggcgggcgtcacgaactccagcaggaccatgtgatc  
gctctctcgtggggtcttctcagggcgactgggtgctcaggtagtggttgcggcagcagcagcggggcgctcggatgggggt  
gttctgctggtagtggtcggcgagctgcacgctgccgtcctcagtggttggcggtatctgaagttcaccttgatccgcttctcgtctg  
ccatgatataagctgtggtctgttagttgactccagcttggcccaggatgttgcgctcctctgaagtcgatcccttcagctcgtg  
cggttaccagggtgtcggcctcgaactcaccctcggcggggtcttgcgtcgtccttgaagaagatggtcgtcctctggagct  
agcctcgggcatgcccggcagaagaagctgctgctcctcagtggttgcgggtagcggctgaagcactgcacgctcagcgtcagcgt  
gtcacgaggtggggcaggcgacggcgagcttggcggtggtgagatgaactcagggtcagcttggcgtagggtggcatcggcctcgc  
cctcggcgacacgctgaacttggccgttacgtcggcctcagctcagcagcagcagcagcagcagcagcagcagcagcagcagc  
cttctcaccatggtggcgaccggtagcgtgacggatctcagcgttactaaaccagctcgttataatagacctcccaccgtacacgc  
ctaccgcccatttgcgtcaatggggcgaggtgttacgacatttggaaagctccggtgatttgggtccaaaacaaactcccattgacgtca  
atggggtggagacttgaaatccccgtgagtcacaaaccgctatccacgcccattgatgactgcaaaaccgcatcaccatggaatagc  
gatgactaatacgtagatgactgccaagtaggaaagctccataaggtcatgactgggcacaatgccagggggccatttaccgtcatt  
gacgtcaatagggggcgtacttggcatatgatacacttgatgactgccaagtgggcagttaccgtaatactccaccattgacgtcaa  
tgaaagctccctattggcgttactatggaaacatacgtcattattgacgtcaatggggcggggtcgttggcggtcagccagggcgcca  
ttaccgtaagttatgtaacggaacgcccgcaggaaccctagtgatggagttggccactccctcctcgtcgcgctcgtcgtcact  
gagggccgggaccaaaggctcggcagcccgggcttggcccggcgccctcagtgagcagcagcagcagcagcagcagcagcagcag  
ggcgctgatgcggtattttctcttacgcatctgtcgggtatttcaaccgcatacgtcaaagcaaccatagtagcgcacctgtagcggc  
gcataagcggcggggtgtggtggttacgcgcagcgtgaccgctacacttgcagcgccttagcggccgctcttctcgttcttccctcc  
ttctcggcacgcttccgggttccccgtcaagcttaaatcgggggtccctttaggggtccgatttagtgcttacggcacctcgacccca  
aaaaacttgatttgggtgatggttcaagtagtgggcatcgcctgatagacggttttccgcttggacgttggagctccacgttcttaatagt  
ggactctgttccaaactggaacaactcaactctatctcgggctattctttgattataagggatttggcatttccggtctattggttaaaaa  
atgagctgatttaacaaaaatlaacgcgaattlaacaaaatattaacgtttacaattttatggtgactctcagtaaatcgtctgatgcc  
gcatagtaagccagccccgacaccgccaacaccgctgacgcgcccctgacgggctgtctgctcccggcatccgcttacagacaa  
gctgtgaccgctcgggagctgcatgtgacagaggtttaccgctacaccgaaacgcgagacgaaagggcctcgtgatacgcct  
attttataggtaatgtcatgataataatggttcttagacgtcaggtggcacttttcgggaaatgtcgcggaaccctatttgttttttcta  
aatacattcaaatatgtatccgctcatgagacaataaccctgataaatgctcaataatattgaaaaggaagatgagattcaacatt  
tccgtgcgcccctattcccttttggcgcatttgcttctgttttgcacccagaaacgctggtgaaagtaaaagatgctgaagatcagtt  
gggtgcagagtggttacatcgaactggatcacaacagcggttaagatccttgagagtttcccccgaagaacggttccaatgatgag  
cactttaaagttctgctatgtggcggtattatcccgtattgacgcccgggcaagagcaactcggctcggcctacacacttctcagaatg  
acttgggtgagtagctaccagtcacagaaaagcatctcaggtgcatgacagtaagagaattatcagctgctccataaacatgagtg  
ataacactcggccaacttactctgacaacgatcggagaccgaaggagtaaccgcttttgcacaacatgggggatcatgtaactc  
gcctgatcgttgggaaccggagctgaatgaagccatacacaacgacgagcgtgacaccagatgcctgtagcaatggcaacaactg  
tgcgcaactattaactggcgaactacttactctagcttcccggcaacaattaatagactggatggaggcggataaagttgcaggacca  
cttctgcgctcggccctccggctggtgttattgctgataaatctggagccggtgagcgtggaagccggtatcattgcagcactggg  
gccagatggaagccctccgctatcgtatctacacgacggggagtcaggcaactatggatgaacgaaatagacagatcgtgag  
ataggtgcctcactgattaagcattgtaactgtcagaccaagttactcatatatactttagattgatttaaaacttattttaaagga  
tctaggtgaagatccttttgataatctatgacaaaatccctaacgtgagtttcttccactgagcgtcagaccccgtagaaagatca  
aaggatcttctgagatccttttctcgcgtaatctgctgctgcaacaaaaaaaccaccgctaccagcgggtgttgggttccggatca  
agagctaccaactcttttccgaaggttaactggctcagcagagcagataccaaatactgttctctagtgtagccgtatgtagccacc  
acttcaagaactctgtagcaccgctacatacctcgtcgtatcctgttaccagtggtcgtcgcagtgccagtgagcagataagctgcttaccg  
ggttggactcaagcagatagttaccggataaggcgcagcggctcgggctgaacggggggtcgtgcacacagcccagcttggagcga  
acgactacaccgaactgagatacctacagcgtgagctatgagaaagcgcacgctcccgaaggagaaaggcggacaggtatc  
cgtaagcggcagggtcgaacaggagcgcagcagggagctccaggggaaaccgctggtatcttatagtcctgctcgggttcc

ccacctgacttgagcgtcgatffffgtgatgctcgtcagggggcgaggcctatggaaaaacgccagcaacggccttttacggtc  
ctggcctttgctggcctttgctcacatgt

### P3-Lenti-dCas9-Tet1-GFP (Addgene #190729)

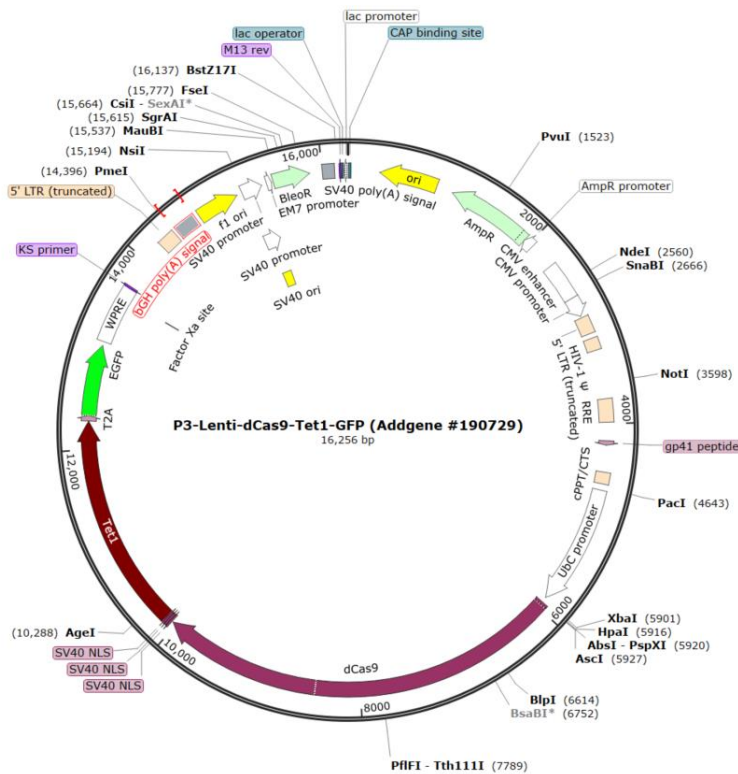

tggggtgcctaagtagtgagctaacacattaattgcggtgcgctcactgccgcttccagtcgggaaacctgctgctccagctgcatta  
 atgaatcgccaacgcgcggggagaggcggttgcgattggcgctctccgcttccctcgtcactgactcgtcgcctcggtcgttcgg  
 ctgcccgcagcggatcagctcactcaaaggcgtaatacggttatccacagaatcaggggataacgcaggaaagaacatgtgagc  
 aaaaggccagcaaaaggccaggaaccgtaaaaaggccgcttgcgcttttccataggctccgccccctgacgagcatcaca  
 aaaaatcgagctcaagtcagagggtggcgaaccggacaggactataagataaccaggcgtttcccctggaagctccctcgtgct  
 ctctgtccgacctgcgcttaccggatacctgctccgcttctccctcgggaagcgtggcgcttctcatagctcacgctgtaggatctc  
 agttcgtgtaggtcgtcctcaagctgggtgctgtgacgaacccccggtcagccgaccgctgctcctatccgtaactatcgtct  
 tgagccaacccgtaagacacgacttatcgccactggcagcagccactggtaacaggattagcagagcgaggtatgtagccggtgc  
 tacagagttctgaagtggtggcctaactcggctacactagaagaacagatattggtatctgcgctctgctgaagccagttacctcggaa  
 aaagagttgtagctcttgatccggcaacaaaccaccgctgtagcgggtggtttttggtgcaagcagcagattacgcgcagaaaaa  
 aaggatcacaagaagatcctttgatcttttacggggtctgacgctcagtggaacgaaaactcacgtaaggatttggctgacagttacca  
 caaaaaggatctcacctgatcctttaaattaataaagaagtttaaatcaatctaaagtataatgagtaaacctggctgacagttacca  
 atgcttaatcagtgaggcacctatctcagcgtatctgtatttgcctcatccatagttgctgactccccgctgtagataactacgatcgg  
 gagggttaccatctggcccagtgctgcaatgataccgagaccacgctcaccggctccagattatcagcaataaacaggccag  
 ccggaaggccgagcgcagaagtggtcctgcaactttatccgctccatccagcttattaattgttgcgggaagctagagtaagtagttc  
 gccagttaatagttgcgcaacggtgtgcatgctacaggcatcgtggtgacgctcgtcgtttggtatggcttaccagctccggtccc  
 aacgatcaaggcaggttacatgatccccatggtgcaaaaaagcggtagctcctcggctcctccgatcgtgtcagaagtaagttggc  
 cgagtgattactcagtggtatggcagcactgcataattcttactgctatccatccgtaagatgctttctgtagctggtgagtaactaac  
 caagtcattctgagaatagtgatgcccgcagcaggtgctctcggcgcaatacgggataataccgcccacatagcagaacttt  
 aaaagtgctcattgaaaacgcttctcggggcgaacactctcaaggatcttaccgctgttgagatccagttcgtgtaaccactcgt  
 gcaccaactgactcagatctttacttaccagcgtttctgggtgagcaaaaacaggaaggcaaaatccgcaaaaaagggaat  
 aaggcgcagacggaaatgtgaatactatactctcctttcaatattgaagcattatcagggtattgctcatgagcggatacatatt  
 tgaatgatttagaaaaataaacaataggggtccgcgcacattccccgaaaagtgccacctgacgctgacggatcgggagatctcc  
 cgatccccatggtgactctcagtaaatctgctctgatgccgcatagtaagccagatctgctccctgctgtgtgtggaggctgctgag  
 tagtgccgagcaaaatgactacaacaaggcaaggctgaccgacaattgcatgaagaatctgcttagggtagggcttttgcgctg  
 ctccgcatgtacggccagatatacgcgttgacattgattattgactgattataatagtaataattacggggtcattgctcatagccat  
 atatggagttccggttacataactacggtaaatggcccgcctggctgaccgccaacgacccccgccattgacgtcaataatgacgt  
 atgtcccatagtaacgcaatagggactttcattgacgtcaatgggtggagtatttacggtaaacctcccacttggcagtacatcaagtg  
 tatcatatgcaagtagccccctattgacgtcaatgacggtaaatggcccgcctggcattatgccagttacatgacattatgggactttcc

tactggcagtacatctacgtattagtcacgctattaccatgggtgatgcggtttggcagtacatcaatggcggtgatagcggttgactca  
cggggattccaagtctccacccattgacgtcaatgggagttgtttggcaccaaaatcaacgggacttcca aatgtcgtacaactc  
cgccccattgacgcaaatggcggttagcggtgtacggtgggaggtctatataagcagcggtttgctgtactgggtctctggttaga  
ccagatctgagcctgggagctctctggtaactagggaaaccactgctaagcctcaataaagcttgcttgagtgctcaagtagtgtg  
cccgctgtgtgtgactctgtaactagagatccctcagacccttttagtcagtggtgaaaatctctagcagtgggcggcgaacagggact  
tgaaagcgaagggaaaccagaggagctctctgacgcaggactcggctgtgaaagcgcacggcaagaggcgaggggcg  
cgactggtgagtagcggcaaaaattttagctagcggaggtagaaggagagagatgggtgagagcgtcagtaaaagcgggggag  
aattagatcgcgatgggaaaaattcggttaaggccaggggaaagaaaaatataaataaaacatatagtagggcaagcagg  
agctagaacgattcgagtaaatcctggcctgttagaaacatcagaaggctgtagacaaatactgggacagctacaacatccctcag  
acaggatcagaagaacttagatcattatataacagtagcaaccctctattgtgtcatcaaaggatagagataaaagacaccaagg  
aagcttttagacaagatagaggaagagcaaaacaaaagtaagaccaccgcacagcaagcggcctgtacttcagacctggagga  
ggagatagagggacaattggagaagtgaattatataaaatataaagtagtaaaaattgaaccattaggagtagcaccaccaaggca  
aagagaagagtggtgcagagagaaaaagagcagtggaataggagctttgtcctgggttctgggagcagcaggaagcactatg  
ggcgacgctcaatgacgtgacggtacaggccagacaattattgtctgtatagtgacgacgagacaattgtcagggctattga  
ggcgcaacagcatctgtgcaactcacagctctgggcatcaagcagctccaggcaagaatcctggctggaaagatacctaaagga  
tcaacagctcctgggattggggtgctctggaaaactcattgaccactgctgtcctggaaatgctagtgaggtaataaatctctgga  
acagattggaatcacagacctggatggagtgggacagagaaataacaattacacaagcttaatacactccttaattgaagaatcgc  
aaaaccgacaagaaaaatgaacaagaattattggaattagaaatggcgaagttgtggaattggttaacatacaaaaattggctg  
tggatataaaaattattcataatgatagtagaggcttggatggttaagaatagttttgtactttctatagtaagagtagtagcagg  
atcccaaccccgaggggaccgacaggcccgaaggaatagaagaagaaggtggagagagacagagacagatccattcgatt  
agtgaacggatcggcactgctgccaattctgcagacaaatggcagttatcccaaatftaaaagaaaagggggattggggg  
gtacagtgcaggggaaagaatagtagacataatagcaacagacatacaactaaagaattacaaaaacaaattacaaaaattcaa  
aattttcgggtttattacaggacagcagagatccagtttggtaattaaccggtcggctccagatctggcctccgcccgggtttggcg  
cctcccgcgggcccctcctcacggcgagcgtgccacgtcagacgaagggcgagcagcgtcctgatcctccgcccggac  
gctcaggacagcggcccgtctcataagactcggccttagaacccagatcagcagaaggacattttaggacgggacttgggtgac  
tctagggcactggtttctccagagagcggaacaggcgaggaaaagtagtccctctcggcgattctcgggagggatcctcgtggggc  
ggtgaaccccgatattatataaggacgcgcccgggtgtggcacagctagtcctcgcagcgggatttgggtcgggtctgtttgtg  
atcgtgtgatcgtcacttggtagtagcgggctgctgggctggccgggcttctgctggccggcgggctcgtgggacggaagcgt  
gtggagagaccccaagggtgtagtctgggctcggcagcaaggttgcctgaaactgggggttgggggagcgcagcaaaatggc  
ggctgtcccagcttgaatggaagacgcttggagggcggctgtgaggtcgtgaaacaagggtgggggcatggtggcgggcaaga  
accgaaggtctgaggccttgcctaatgcccgaagctctattcgggtgagatgggctggggcaccatctggggaccctgacgtgaag  
ttgtcactgactggagaactcggtttgcgtctgttgcggggcggaattatggcgggtcgggtgggagtgaccctgactttgggag  
cgcgcccctcgtcgtgacgtcaccctgtctgttgccttataatgacgggtggggccacctgcccgttaggtgtcggtaggctttct  
ccgtcgcaggacgcaggggtcgggctagggtcctcgaatcagacaggcggcggacctctggtgaggggagggataagtg  
ggcgtcagtttcttggctggtttatgtacctatcttctaagtagctgaagctccggtttgaactatgcgctcggggttggcgagtggtttgt  
gaagtttttaggcacctttgaaatgtaactattgggtcaatgtaatttcagtgtagactagtaaatgtccgctaaattcggcgtttt  
gcttttttagacgaagcttgggctgcaggtcagcttagaggatccagttaacctcagggcgcgccatggacaagaagtattctat  
cggactggccatcgggactaatagcgtcgggtgggcccgtgactgacgagtagcaaggtgccctctaagaagttcaaggtgctcggg  
aacaccgaccggcattccatcaagaaaaatctgatcggagctcctctttgattcaggggagaccgctgaagcaaccgctcaagc  
ggactgtagacggcggtagaccaggaggaagaaccggattgttacctcaagagatattccaacgaaatggcaaaaggtcagc  
acagcttctccataggctggaagaatcattcctcgtggaagaggataagaagcatgaacggcatccatctcggtaatatcgtcagc  
aggtggcctatcacgagaaatacccaaccatctaccatctcgaaaaagctggtgactcaaccgacaagcgacacctcggctat  
ctacctggcccctggccacatgatcaagttcagagggcactcctgatcagggcgacctcaatcctgacaatagcagtagtggaataac  
tgtcatccagctggtgcagacttacaaccagctcttgaagagaaccatcaatgcaagcggagtcgatgcaaggccattctgtcag  
cccggctgcaaaagaccgacagactgagaatcttatcgtcagctcggggtgaaaagaaaaatggactgtcgggaacctgattgct  
ctttcacttgggctgactcccaattcaagtcaatttcgacctggcagaggatgccaagctgcaactgtccaaggacacctatgatgacg  
atctcgacaacctcctggcccagatcggtagccaatacggaccttttctgctgctaagaatcttctgacgccatcctgctgtgaca  
ttctccgctgaactgaaatcaccgaagcccctcttcagctcaatgattaagcgggtatgatgagcaccaccaggacctgacctgct  
taaggcactcgtccggcagcagctccgggagaagtacaaggaaatctctttgaccagctcaagaatggatacggcggctacatcgac  
ggaggtgctcccaagaggaattttataagttatcaaacctatccttgagaagatggacggcaccgaagagctcctcgtgaaactgaat  
cgggaggtatcgtcgggaagcagcgcactttcgacaatgggagcattcccaccagatccatctggggagcttcaagccatcctcg  
gcccgaagaggacttctacccttctaaggacaacagggagaagattgagaaaattctcacttccgcatcccctactacgtgggacc  
cctcggcagaggaaatagccggttctgtgtagaccagaaagtcagaagaaactatcactcctggacttcaagaggtggtggac  
aaggagccagcgtcagctattcatgaacggatgactaactcgataagaacctcccaatgagaaggtcctgcccgaacattccc  
tgctctacgagtactttaccgtgacaacgagctgaccaaggtgaaatgtcaccgaagggtgaggaagcccgacttctgtcaggg  
gaacaaaagaaggcaattgtggacctctgtcaagaccaatagaagggtgaccgtgaagcagctgaaggaggactattcaagaaa

attgaatgcttcgactctgtggagattagcggggtcgaagatcggttcaacgcaagcctgggtacctaccatgatctgcttaagatcatca  
aggacaaggattttctggacaatgaggagaacgaggacatccttgaggacattgtcctgactctcactctgttcgaggaccgggaaatg  
atcgaggagaggcttaagacctacgcccactgttctgacgataaagtatgaagcaacttaaacggagaagatataccggatgggga  
cgcttagccgcaaacatcaacggaatccgggacaacagagcggaaagaccattcttgatttcctaaagcgacggattcgcta  
atcgcaactcatgcaactatccatgatgattcctgaccttaaggaggacatccagaaggccaagtgtctggacagctggtcaagg  
gcacgagcatatcgcaaatctggctggtcaccgctattaagaagggtattctccagaccgtgaaagtcgtggacgagctggtcaagg  
tgatgggtcgcataaacagagaacattgtcatcgagatggccagggaaaaccagactaccagaagggacagaagaacagca  
gggagcggatgaaaagaattgaggaagggattaaggagctcgggtcacagatcctaaagagcaccgggtggaaaacaccagct  
tcagaatgagaagctctatctgtactacctcaaaatggagcgcgatgtatgtggaccaagagcttgatcaacaggctctcagactac  
gacgtggagccatctccctcagagcttctcaagacgactcaattgacaataagggtgctgactcgtcagacaagaaccgggga  
aagtcagataacgtgccctcagaggaagctgtgaaaaagatgaagaactattggcgcagcttctgaacgaaagctgatcactcag  
cggaaagttcgacaatctcactaaggctgagaggggaggactgagcgaactggacaaagcaggattcattaaaccgcaactgtgga  
gactcggcagattactaaacatgtcgccaaatcctgactcacgcatgaataccaagtacgacgaaaacgacaaacttatccgagag  
gtgaagggtattaccctgaagtcgaagctggcagcattcagaaaggacttcaattctacaaagtgcgggagatcaataactatcatc  
atgctcatgacgcatatctgaatgccgtggggaaaccgcccgtatcaagaagtaccctaaagctggaaagcaggtctgtacggaga  
ctacaaggtctacgagctgcgcaagatgattgcaaatctgagcaggagatcggaaggccaccgcaaaagtacttctacagcaac  
atcatgaatttcaagaccgaaatcaccctgtcaaacgggtgagatccggaaagggcgtcctacgagactaattggggagactggcg  
aaatctgtgggcaaaagggcagagattctgctaccgtgcgcaagtgcttctatgctcaagtgaaacatcgaaagaaaccgagtg  
caaacgggaggttttcaaggaatcaatcctcccgaagcgcgaactccgacaagctcattgcaaggaagaaggattggaccctaa  
aagtcggcgggattcattcacaactgtggcttattctgctggctggtgtaagggtgaaaaaggaaagctaaagaagctcaagag  
cgtgaaggaactgtgggtatcaccattatggagcgcagctcctcgagaagaaccaattgacttctcgaagccaaagggttacaagg  
aagtcagaaggaccttatcatcaagctccaaagtatagcctgttcgaactggagaatgggagggaagcggatgctcgcctccgctgg  
cgaactcagaaggtaatgagctggctcctcccaagtcagtgaaatttctctaccttgaagccattacgagaagctgaaggggag  
ccccgaggacaacgagcaaaagcaactgtttgtggagcagcataagcattatctggacgagatcattgagcagatttccgagtttctaa  
acgctcattctcgtgatgccaacctcgataaagtccttagcgcatacaataagcacagagacaaaccaattcgggagcaggctgag  
aatacatccacctgtcaccctaccaatctgtgcccctgcccattcaagtacttgcacaccaccatcgaccgaaacgctatacct  
ccacaaagaagtgctggagccaccctcatccaccagagcatcaccggactttagaaactcggattgacctctcacagctcggag  
gggatggtggcggaggctcgcaaaaaagaagagaaaggtagaccctaaagaaaaacgaaaagtagatccgaaaaagaaga  
ggaaggtgggacccctgccacctgacgtgctttagatgagttatacaaaaagacaaaggccatattatacacacctggggcagg  
accaagtggtgctgctgtagggaaatcatggagaataggtatggtcaaaaaggaaacgcaataaggatagaatagtagtgacac  
cggtaaagaagggaaaagctctcatgggtgccaattgtaagtggttttaagaagaagcagtgatgaagaaaaagttcttgggtgct  
cggcagcgtacaggccaccactgtccaactgctgatgggtgctcatatgggtggtggtatggcatccctcttcaatggccgaccgg  
ctatacacagagctcacagagaatctaaagtcatacaatgggcaccctaccgacagaagatgcaccctcaatgaaaatcgtaacctgta  
catgtcaaggaattgatccagagactgtggagcttacttcttttgctgttcatggagatgtactttaatggctgtaagttggtagaagcc  
caagcccagaagatttagaattgatccaagctccttcatgaaaaaaccttgaagataacttacagatttggctacacgattag  
ctccaattataagcagatgctccagtagcttaccaaaatcaggtggaatatgaaaatgttgcccgagaatgctggcttggcagcaagg  
aaggtcgacccttctctgggtcactgcttgcctggacttctgtgctcatcccacagggacattcacaacatgaataatggaagcactgt  
ggttctaccttaactcgagaagataaccgctcttgggtgttattctcaagatgagcagctccatgtgctaccttataagcttccagaca  
cagatgagtttggctccaaggaaggaatggaagccaagatcaaatctgggccaatcgaggctcctggcaccggcggcaaaaaag  
aacgtgttctactcagcctgttcccgttctgaaagaagagggtcgcgatgatgacagaggttctgacataagataagggcagtgga  
aaagaaacctattccccgaatcaagcggagaataactcaacaacaacaacaacagtaagccttctgactgccaaccttaggga  
gtaacactgagaccgtgcaacctgaagtaaaaagtgaaccggaacccatttcttaaaaagttcagacaacactaaaacttattcg  
ctgatgcatccgctcctcaccagtgaaagaggcatctccaggcttctctgttccccgaagactgcttcagccaccagctccactg  
aagaatgacgcaacagcctcatcggggtttcagaagaagcagcactcccactgtacgatgccttcgggaagactcagtggtgcca  
atgctcagctgctgatggccctggcatttcacagctggcgaaatggctcctctcccaccctgtctgctcctgtgatggagcccctatta  
attctgagccttccactgggtgactgagccgtaacgctcatcagccaaaccaccagccctccttctcactctcctaagacctgccc  
tcttctcaatggaagaagatgagcagcattctgaagcagatgagcctccatcagacgaaccctatctgatgaccccctgtcacctgct  
gaggagaaattgccccacattgatgagtattggtcagacagtgagcacatcttttggatgcaaatattggtgggggtggccatcgacctg  
ctcacggctcggttttagtgatgtgcccggcagagctgcacgctaccactcctgttgagcaccctaacctaatcatcaaccgct  
ctccctgtctttaccagcacaacaaacctaataagccccaacatggtttgactaaacaagattaagtttagggctaaagaagctaag  
aataagaaaatgaaggcctcagacaaaagaccaggcagctaatgaaggtccagaacagtcctctgaagtaaatgaattgaacc  
aaattcctctcataaagcattaacattaacctatgacaatgtgtcaccgtgcccctatgctctcacacagttgcccgggcccctataacc  
attgggtcgagggcagaggaagctgctaacatgctgacgctcagggagaatcctggcccagtgagcaagggcgaggagctgttc  
accgggggtggtgccatcctggtcagctggacggcagcgtaaacggccacaagttcagcgtgtccggcgagggcgaggcgatgac  
cacctacggcaagctgaccctgaagttcatctgcaccaccggcaagctgcccgtgcccctggcccaccctcgtgaccaccctgacctac  
ggcgtcagtgctcagccgctaccccagaccatgaagcagcagcacttctcaagtcgccatgcccgaaggctacgtccaggag

cgaccatcttctcaaggacgacggcaactacaagacccgcccggaggtgaagttcgagggcgacaccctggtgaaccgcatcga  
gctgaagggcatcgacttcaaggaggacggcaacatcctggggcacaagctggagtacaactacaacagccacaacgtctatatcat  
ggccgacaagcagaagaacggcatcaagtgaaactcaagatccgccacaacatcgaggacggcagcgtgacgtcgccgacca  
ctaccagcagaacacccccatcgggcagggccccgtgctgctgccgacaaccactacctgagcaccagtcgccctgagcaaag  
acccaacgagaagcgcgatcacatggtcctgctggagttcgtgaccgccgggatcactctcgcatggacgagctgtacaagg  
aattcaattctaactaggaattcgatatcaagctatcgataatcaacctctggattacaaaattgtgaaagattgactggtattctaactat  
gttgcctctttacgctatgtggatacgtgcttaatgcctttgtatcatgctattgctccgtagtgcttccattttcctcctctgtataaatctgg  
ttgctgtctctttatgaggagttgtggccgtgtcaggcaacgtggcggtgtgactgtgttctgacgcaacccccactggtggggc  
attgccaccacctgtcagctccttccgggactttcgctttccccctccctattgccacggcggaaactcatcgccgctgcttggccgctgt  
ggacaggggctcggtgttgggactgacaattccgtggtgttgcggggaaatcatcgtccttccctggctgctgcctggttggccacct  
ggattctgcgcgggacgtccttctgctacgtcccttcggccctcaatccagcggaccttccctccgcggcctgctgcccgtctgcggcct  
cttccgctcttgccttcgccctcagacgagtcggatctccctttggccgctcccccgcatacgataccgtcgacctcgagacctagaaa  
aacatggagcaatcacaagtagcaatacagcagctaccaatgctgattgtgctggctagaagcacaagaggaggaggagggtgggt  
ttccagtcacacctcaggtaccttaagaccaatgacttacaaggcagctgtagatcttagccacttttaaaagaaaaggggggactgg  
aagggttaattcactccaacgaagacaagatattgatctgtggatctaccacacacaaggctacttccctgattggcagaactaca  
caccagggccaggatcagatattcactgacctttggatggtgtacaagctagtagaccagttgagcaagagaaggtagaagaagcca  
atgaaggagagaacacccgctgttacacctgtgacccctgcatggatggatgacccggagagagaagattagagtgagggtttga  
cagccgctagcatttcatgacatggcccagagctgcatccggactgtactgggtctctctggttagaccagatcgagcctgggagctc  
tctggctaactagggaaacccactgcttaagcctcaataaagctgcttagtgctcaagtagtgctgcccgtctgtgtgactctggtgta  
actagagatccctcagacccttttagtcagtggtgaaaatctctagcagggcccgttaaacccgctgatcagcctcgactgtgcctctag  
ttgccagccatctgttggccctccccgtgccttctgacctggaaggtgccactcccactgcttcttaataaaatgaggaaatt  
gcatcgattgtctgagtaggtgtcattctattctgggggtgggggtggggcaggacagcaagggggaggattgggaagacaatagca  
ggatgctggggatgagggtggctctatggcttctgaggcggaaagaaccagctggggctctaggggtatccccacgcgccctgtag  
cggcgcatlaagcgcgggggtgtggtgttacgcgcagcgtgaccgctacacttgcagcgccttagcggccctcttctgcttctc  
ccttcttctcgccacgttcgcccgttccccgtaagctcaaatcgggggctcccttaggggtccgatttagtcttacggcacctcga  
ccccaaaaacttgattagggatggttacgtagtggccatcgccctgatagacggttttcggccttgacgtggagttcacgctctt  
aatagtgactctgttccaaactggaacaacactcaacctatctcgtctattctttgattataagggatttggcatttcggcctattggt  
taaaaaatgagctgatttaacaaaaattaacgcgaattaattctgtggaatgtgtgctagttagggtgtgaaagtcccaggctcccca  
gcaggcagaagtagcaaacgcatcatctcaattagtcagcaacctatgcccggcctactccgcccataccgcccctactccgc  
ccagttccgcccattctccgcccattggtgactaattttttatgacagaggccgaggccgctctgcccctgagctattccagaagta  
gtgaggaggcttttggaggcctaggctttgcaaaaagctcccgggagctgtatataccatttccgtagctgatcagcacgtgtgacaatt  
aatcatcgccatagtagtatacgccatagtagtataacgacaaggtgaggaactaaacctggccaagttgaccagtgccgttccgggtgct  
accgcgcgagctgcgggagcgggtcagattctggaccgaccggctcgggttctccgggactctgaggagcagactcgcgggtg  
tggctccgggacgacgtgacctgttcatcagcgcgggtccaggaccaggtggtgccggacaacaccctggcctgggtgtgggtgcccg  
gcctggacgagctgtacccgagtggtcggaggtcgtgtccacgaactcggggacgcctccggggccggccatgaccgagatcggcg  
agcagccgtggggggggagttcgccctgcgcgacccggcggcaactcgtgactctggtggcggaggagcaggactgacacgt  
gctacgagatttcgattccaccgcccctctatgaaaggtgggcttcggaatcgtttccgggacgccggctggatgatcctccagcgc  
gggatctcatgctggagttctcgcccacccaactgfttattgcagcttataatggttacaaataaagcaatagcatcacaatttaca  
aataaagcatttttactgcattctagttgtggtttgtccaaactcatcaatgtatcttatcatgtctgtataccgctgacctctagctagagct  
ggcgtaatcatggtcatagctgttctgtgtgaaattgttatccgctcacaattccacacaacatacagccggaagcataaagtgtaaa  
gcc



### P3-pKLV2-U6gRNA(BbsI)-PGKpuro2A-mCherry

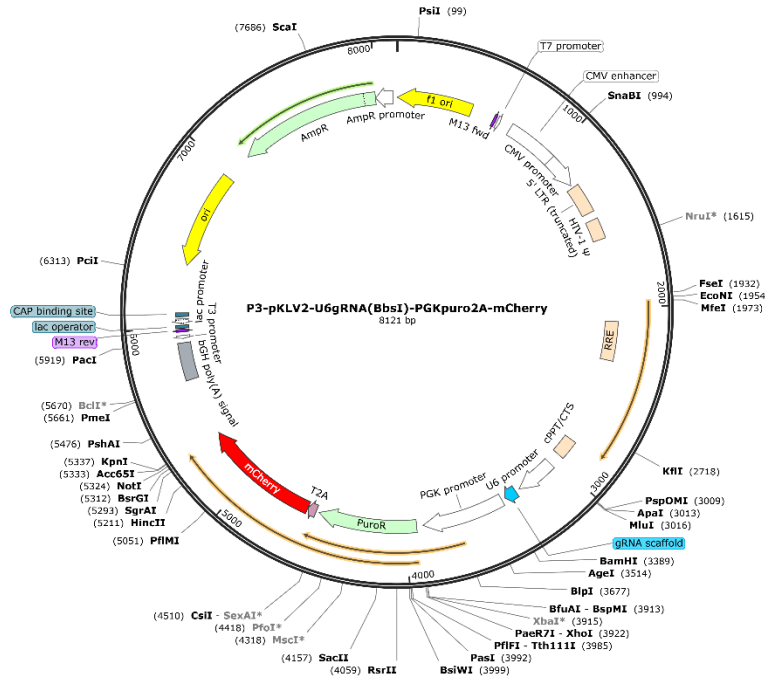

ctaaattgtaagcgtaatatgtttaaattcggttaaattttgttaaactcagctcatttttaaccaataggccgaaatcgccaaaatccct  
tataaatcaaaagaatagaccgagataggggtgagtggttccagtttgaacaagagtcactattaaagaacgtggactccaacgct  
aaagggcgaaaaccgtctatcaggcgatggccactacgtgaaccatcacctaatcaagttttggggtcgaggtgccgtaaag  
cactaaatcggaaccctaaagggagccccgattagagctgacgggaaagccggcgaactggtcgagaaaggaaggaag  
aaagcgaagggagcggcgctagggcgctggaagtgtagcgtcagctgcggtaccaccacaccgcccgcgctaatgccc  
cgctacagggcgctccattcgccattcaggctgcgcaactgttgggaagggcgatcggtgcccgtcttgcgtattacgagctgg  
cgaaaggggatgtgctgaaggcgattaagttgggtaacgccagggtttccagtcacgagctgtgaaaacgacggccagtgagcg  
cgctaatacagactcactatagggcgaattgactagtataatgaatcaattacggggcattagttcatagccatataatggagttccg  
cgtaataactacggtaaatggcccgcctgctgaccgccaacgacccccgccattgacgtcaataatgacgtatgtcccatagt  
aacgcaataggactttccattgacgtcaatgggtggagtattacggttaaactgccacttggcagtaacatcaagtgatcatatgcca  
agtacgccccctattgacgtcaatgacggtaaattggcccgcctggcattatgccagtacatgacctatgggacttctacttggcagta  
catctacgtattagtcacgtctattaccatggtgatcggttttggcagttacatcaatgggctggatagcgggttgactcacgggattcca  
agtctccaccccattgacgtcaatgggagttgttttggcaccaaaatcaacgggactttcaaaaatgctgtaacaactccgccccattga  
cgcaaatggcggttagcgtgacgtgggaggtctataatagcagcgcggtttgctgtactgggtctctctggttagaccagatctgag  
cctgggagctctctggttaactaggaaccactgcttaagcctcaataaagcttgcctgagtgctcaagtagtggtgcccgtctgtgtg  
gtgactctgtaactagagatccctcagacccttttagtcagtggtgaaaaatctctagcagtgccgcccgaacagggacttgaagcga  
aagggaaaccagaggagctctctcagcgcaggactcggctgtgtagcgcgcacgggaagagggcagggggcgactggtga  
gtacgcaaaaattttagctagcggaggctagaaggagagatgggtgtagagcgtcagtagtataagcgggggagaattagatcg  
cgatgggaaaaaattcggtaaggccagggggaagaaaaataaaataaaacatataatgtagggcagcaggggagctagaac  
gattcgcagttaatcctggctgttagaacaatcagaaggctgtagacaataactgggacagctacaaccatccctcagacagagatca  
gaagaacttagatcattataatcagtagcaacccttattgtgtcactcaagggatagagataaaagacaccaaggaagcttta  
caagatagagggaagcaaaacaaaagtaagaccaccgacagcaagcggccggcgcgctgatctcagacctggaggagga  
gatatgagggacaattggagaagtgaattatataatataaagtagtaaaaattgaaccattaggagtagcaccaccaaggcaag  
agaagagtggtgagagagaaaaagagcagtggaataggagctttgtccttgggttcttgggagcagcaggaagcactatgggc  
gcagcgtcaatgacgtgacggtacaggccagacaattattgtctggtatagtcagcagcagaacaattgctgagggctattgaggc  
gcaacagcatctgtgcaactcacagctctgggcatcaagcagctccaggcaagaatcctggctgtgaaagatacctaaaggatca  
acagctcctgggatttggggtgctctggaaaactcattgaccactgctgtgccttggatgctagttggagtaataaatctctggaaca  
gatttggaaatcacacgacctggatggagtgggacagagaaattaacaattacacaagcttaatacactccttaattgaagaatcgaaa  
accagcaagaaaagaatgaacaagaattattggaattagataatgggcaagtttgggaattggttaacataacaaattgctgtggt  
atataaaattatcataatgatagtaggaggttggtaggttaagaatagttttgctgacttctatagtagaatagagtaggacgggatatt  
caccattatcgtttcagaccacctcccaaccccgaggggacccgacaggccgaaggaatagaagaagaaggtggagagagag  
acagagacagatcattcagatttagaacggatcggcactcgtgcgccaattctgcagacaaatggcagattcatcacaattttaa

agaaaagggggattgggggtacagtgacggggaaagaatagtagacataatagcaacagacatacaaaactaaagaattaca  
aaacaaattacaaaaattcaaaatcttgggtttattacagggacagcagagatccagttggtagtaccggccctacgctccaaggt  
cgggaggaagagggcctatttccatgattcctcatattgcatatacgatacaaggctgtagagagataattagaattaattgactgt  
aaacacaaagatattagtaaaaatcgtgacgtagaaagtaataatcttgggtagttgacgtttaaaattatgtttaaaattgactat  
catatgctaccgtaactgaaagtattcgtatttctggctttatatactgtgaaaggacgaaacaccgggtctcgagaagacacgttt  
agagctagaaatagcaagttaaaataaggctagcttcaactgaaaaagtgaccagctgctgtgcttttttgatccaattctac  
cgggtaggggagcgcttttccaaggcagctcggagcatcgcttttagcagccccgctgggcaactggcgtacacaagtggcctctg  
gcctcgcacacattccacatccaccggtaggcgccaaccggctcctgttggggccctcgcgccacttactcctcccctagtca  
ggaagtccccccgccccgagctcgcgtcgtgacggacgtgacaaatggaagtagcacgtctactagctcgtgacagatggaacag  
caccgctgagcaatggaagcgggtaggcctttggggcagcggccaatagcagctttgctcctcgtttctgggctcagaggctgggaa  
gggtgggtccggggggcgggctcaggggccccgctcaggggccccgcccgaaggtcctccggaggccccggcattctgca  
cgttcaaaagcgcacgtcgcgcgttctcctctcctcatctccgggctttcagctcatccatctagatctcagcagctgaagc  
ttaccatgaccgagtaaacgccaaggtgcgctcgcaccccgagcagctcccagggcgtacgacacctcgcgcccggcttcg  
ccgactaccggccacgcgccaaccgctgatccggaccgccaatcgagcgggtcaccgagctgcaagaactctcctcacgcgc  
gtcgggctcgacatcggcaaggtggtggtcgcggacgagcggcggcggtggtggtcggaccagccggagagcgtcgaagcgg  
ggcggtgttcggagatcggccccgcgatggccgagttgagcgggtcccggctggccgagcaacagatggaagggcctctg  
cgcggcaccggccaagggagcccgctggttctggccaccgctcgcggcaccagggcaagggctggtggcagc  
ccgtcgtctccccggatggaggcggcggagcgcgggggtgcccgttctggagacctcgcgccccgaacctcccctcta  
cgagcggctcggctcaccgtcaccgcccagctcgaaggtgcccgaagaccgacacctggtgatgacccgcaagcccgggtgccg  
gcccgggtcgggagggagggcagaggaagtctcctaactgcggtgacgtggaggagaatcctggccaatggtgagcaagg  
gagggaggataactccgcatcaaggagttctcgtcctcaaggtgcacatggagggtcctgtaacggccaaggttcgagat  
cgagggcagggcgagggccccctacgagggcaccagaccgccaaggtgaaggtgaccaaggggtggccccctgcctctgc  
ctgggacatcctgtcccctcagttcatgtacggctccaaggcctacgtgaagcaccgcccagacatccccgactactgaagctgtcctc  
cccagggctcaagtgggagcgcgtgatgaacttcgaggacggcggcggtggtgaccgtgacccaggactcctctcgcaggacggc  
gagttcatctacaaggtgaagctgcgcccacccaactcccctcggacggccccgtaatgcagaagaaaaccatgggctgggagggc  
ctcctccgagcggatgaccccgaggacggcggcctgaagggcgagatcaagcagagggctgaagctgaaggacggcggccacta  
cgacgtgaggtcaagaccacctaagaagcccgctgacgtcggcgccctacaacgtcaacatcaagttggacatca  
cctcccacaacgaggactacaccatcgtggaacagtacgaacgcggcggggccgactccaccggcggcatggacgagctgta  
caagtgagcggcgtaggtaccttaagaccaatgacttacaaggcagctgtagatcttagccacttttaaaagaaaagggggact  
ggaagggctaattcactccaaagaagtaagatctgcttttgcctgactgggtctctggttagaccagagctctctggttagaccag  
atctgagcctggagctctcgtgtaactagggaaaccactgcttaagcctcaataaagctgcttgagtgctcaagtagtgtgcccg  
tctgtgtgactcgtgtaactagatccctcagacccttttagtcagtggtgaaaatctctagcagtttaaccgctgatcagcctcagc  
tgtcctctagttgccagccatctgtgttggccccctccccgctgcttcttgaccctggaaggtgccaactcccactgcttcttaataaaa  
tgaggaaattgcatcgcattgtctgagtaggtgctattctattctgggggtgggggtggggcaggacgaagggggaggtgggaaag  
tcaatagcaggcatgctgggatcgggtgggctctatggggggccgttaattaagctttgttccccttagtgaggggttaattgcccgttggc  
gtaatcatggtcatagctgttctgtgtgaaattgtatccgctcacaattccacacacatacagagccggaagcataaagttaaagcct  
gggggtcctaagtagtgagtaactacattaattgctgtgctcactgcccgtttccagtcgggaaacctgctgctcagctgcattaa  
tgaatcgccaacgcggggagagggcgggttgcgtattggcgtctctccgctcctcgtcactgactcgtcgcctcgtcgttggct  
gcccggagcggatcagctcactcaaggcggtatacgggtatccacagaatcaggggataacgcaggaaagaacatgtgagca  
aaagggcagcaaaagggcaggaaccgtaaaaagcggcgttctggtgcttttccataggtcggccccctgacgagcatcaaa  
aaatcgacgtcaagtcagaggtggcgaacccgacaggactataaagataaccaggcgtttcccctggaagctcctcgtgctcct  
cctgttccgacctgcccgtaccggatacctgtccgcttctcccctcggaagcgtggcgctttctcatagctcagcgtgtaggtatcta  
gttcgggtgaggtcgtcgtccaagctgggtgtgtgcacgaacccccgttcagcccagccgctgcccctatccggtaactatcctt  
gagccaacccggtaagacacgacttatcgccactggcagcagccactggaacaggattagcagagcgggtatgtagcgggtgct  
acagagttctgaaagtggtgcccactacggctacactagaaggacagattttggtatctcgcctctgtaagccagttacctcggaa  
aaagagttgtagctctgacggcaacaaaccaccgctgtagcgggtggtttttgttgcaagcagcagattacgcgcagaaaaa  
aaggatctcaagaagatcctttgatctttctacggggtcgtacgctcagtggaacgaaaactcacgttaagggttttggctgagattat  
caaaaaggatctcacctagatccttttaaaatgaaatgaaatgaaatcaatctaaagtataatagtaaactggctgacagttacca  
atgcttaatcagtgaggacatctcagcgtatcttatttctcctatgctgctgactccccgctgtagataactacgatacgg  
gagggcttaccatctggcccagctgcaatgataccgagaccacgctcaccggctccagattatcagcaataaaccagccag  
ccggaagggcggagcgcagaagtggtcctgcaactttatccgctccatccagcttataattgttccgggaagctagagtaagtagtcc  
gccagttatagttgcaacgttggcattgctacaggcatcgtggtgacagctcgtcgtttggtaggttattcagctccggttccc  
aacgatcaaggcagttacatgatccccatgtgtgcaaaaaagcgggttagctcctcggctcctccgatcgttcagaagtaagttggc  
cgaggttatcactcatggtatggcagcactgcataattcttactgctatgccatccgtaagatgcttttctgtagctggtgagtagtcaac  
caagtcattctgagaatagtagtgcggcagcaggtgcttggccggcgtcaatacgggataataaccgcccacatagcagaactt  
aaaagtctcatcattgaaaacgttctcggggcgaaaactctcaaggatctaccgctgttagatccagttcagatgaaccactcgt

gcacccaactgatcttcagcatctttactttcaccagcgttctgggtgagcaaaaacaggaaggcaaaatgccgcaaaaagggaat  
aagggcgacacggaaatgtgaatactcatactcttcttttcaatattattgaagcattatcagggttattgtctcatgagcggatacatatt  
tgaatgtatttagaaaaataaacaataggggtccgcgcacattccccgaaaagtgccac

**Supplementary Fig. 8. Sequence and map of the plasmids used for DNA methylation editing.**  
More information and the plasmids will be available upon request. Plasmids constructed for this study can be obtained via Addgene.

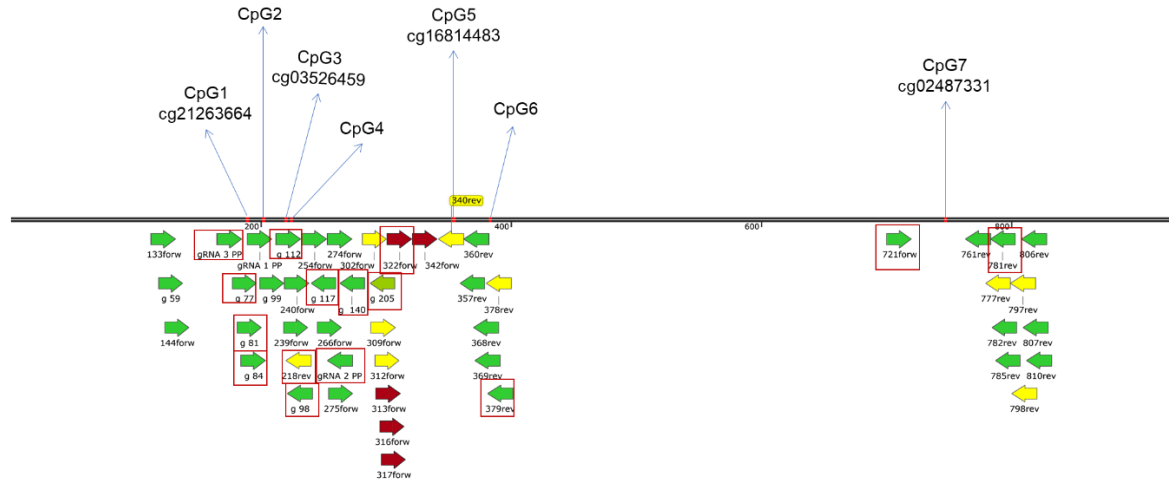

**Supplementary Fig. 9. Map of the gRNAs designed to target the 1q21.1 DMR.**

All the gRNAs were designed by CRISPOR Version 4.98. The gRNAs in the rectangle were used for the gRNA screening on HEK293T cells (the sequences are listed in the Supplementary Table 10).

## Supplementary Methods

### Ethics approval and consent to participate

All experiments on human subjects were approved by the Regional Ethical Review Board in Stockholm and carried out in accordance with institutional guidelines. Written informed consent was obtained from all study participants. iPSC experiments are in accordance with an IRB approval from the Ethical Review Boards in Stockholm, Sweden. Zebrafish experiments were carried out according to the guidelines of the Ethics Committee of IGBMC and ethical approval was obtained from the French Ministry of Higher Education and Research under the number APAFIS#15025-2018041616344504.

### Cohorts

Details of the cohorts are described in the Supplementary Table 1. Briefly, for genome-wide DNA methylation and methylation quantitative trait locus (meQTL) analysis used in cohort 1, peripheral blood samples were collected from 140 MS patients including 120 RRMS, 4 PPMS and 16 SPMS patients, and 139 healthy individuals (HC), as previously described<sup>5</sup>. An independent cohort, cohort 2, consisting of 48 RRMS and 36 PPMS patients (matched for age, sex, disease duration and Swedish descent) was used for pyrosequencing validation and locus-specific meQTL analysis<sup>6</sup>. Cohort 3 and the additional Italian cohort used for genetic association study comprises 1,104 PPMS and 11,335 BOMS, as described in the corresponding sections below. Gene expression data (RNA-sequencing) from bulk brain tissue samples of progressive MS patients (5 PPMS and 7 SPMS) and non-neurological controls (n = 10), previously described<sup>7</sup>, were used for correlation network analysis and validation was performed in neuronal snRNA-seq data<sup>8</sup>. Additionally, we utilized publicly available databases from xQTL serve<sup>9</sup> (n = 543 bulk prefrontal cortex samples, <http://mostafavilab.stat.ubc.ca/xQTLServe/>) and GTEx (selecting all available nervous tissues, <https://gtexportal.org/>) platforms to address meQTL and eQTL effects in the CNS. No sample size calculation was performed for the cohorts involved in this study.

### Genome-wide DNA methylation and meQTL analyses (cohort 1)

*DNA methylation analysis.* The methylation data from Infinium HumanMethylation450 (450K) arrays was preprocessed as previously described<sup>5</sup> using the Illumina default procedure implemented in the Bioconductor minfi package<sup>10</sup>. Briefly, all samples were normalized together using the minfi preprocessQuantile function. The probe level raw data for each sample were normalized using Illumina's control probe scaling procedure and converted to methylation  $\beta$  values on the 0–1 scale ( $M/(M + U + 100)$ , where M and U represent the methylated and unmethylated signal intensities, respectively). Cell counts for the six major cell types in blood (granulocytes, B cells, CD4<sup>+</sup> T cells, CD8<sup>+</sup> T cells, monocytes, and NK cells) for each individual were estimated using the estimateCellCounts function in minfi package<sup>10</sup>, which obtain sample-specific estimates of cell proportions based on reference information on cell-specific methylation signatures<sup>11</sup>. Results from the estimation can be found in<sup>5</sup>. To identify differentially methylated regions (DMRs) associated with the PPMS phenotype, we used the bumpHunter function in minfi package<sup>10</sup> with adjustment for confounders: age, sex, self-reported smoking status (ever smokers vs. never smokers), hybridization date, and the first two principle components of estimated differential cell counts. Region that has a family wise error rate (FWER) less than 0.05 with 1000 resamples and contains at least 2 probes was identified as a trait-associated DMR.

*Methylation QTL analysis.* To identify potential genetic dependency, the PPMS-associated DMR was tested for association with genotype (594,262 SNPs) using an additive minor-allele dosage model. Genotype-DMR associations were corrected for multiple testing using a stringent Bonferroni-adjusted threshold of 0.05.

### Locus-specific DNA methylation and meQTL analyses (cohort 2)

*DNA methylation analysis.* For validation of the identified PPMS-associated DMR, pyrosequencing analysis was performed using 500 ng of genomic DNA samples previously converted to bisulfite DNA (BS-DNA, EZ DNA methylation kit, ZYMO research) with PyroMark Q96 system (Qiagen). Primers and probes for three sequencing assays covering 7 CpG sites in the locus were designed by PyroMark Design software (Qiagen) (Supplementary Table 12, Supplementary Fig. 5). Around 10 ng of BS-DNA was amplified using PyroMark PCR kit (Qiagen) and the forward and 5'-biotinylated reverse primers. The entire PCR product, 4 pmol of the sequencing probe and streptavidin sepharose high-performance beads (GR Healthcare) were used for pyrosequencing on a PyroMark Q96 ID pyrosequencing instrument (Qiagen) using the PyroMark Gold 96 Reagent kit (Qiagen). Methylation levels were determined by the ratio of C and T by the PyroMark CpG software 1.0.11 (Qiagen) and expressed as percentage methylation at each CpG site. To verify the efficiency and sensitivity of the PCR-pyrosequencing, we used standard curves with unmethylated and methylated human BS-DNA samples (Qiagen). To test the differences in DNA methylation between PPMS and RRMS patients for each CpG site, non-parametric Mann-Whitney U test was applied with GraphPad Prism software (PRISM 7.0; GraphPAD Software Inc., San Diego, CA, USA). We have done extensive SNP and sequence analyses to assure that the methylation measurements of the majority of the DMR CpGs are not a result of the technical measurement artefacts driven by a potential effect of SNPs on the CpGs<sup>12,13</sup>, pyrosequencing or 450K assays.

*Methylation QTL analysis.* Methylation data was RANK transformed in R using R Core team (Vienna, Austria, <https://www.R-project.org/>). Genotyping was carried out at deCODE (deCODE genetics/Amgen, Reykjavik, Iceland) using Illumina OmniExpress chip with 716,503 SNPs mapped to the Human Assembly Feb.2009 (GRCh37/hg19). Of 84 individuals, 83 were genotyped in deCODE and 82 of them passed QC. We performed meQTL analysis of chromosome 1 from bp 146500000 to bp 147000000, in PLINK<sup>14</sup> excluding SNPs with less than 98% genotyping rate and SNPs that were not in Hardy-Weinberg equilibrium ( $p < 0.05$ ) and corrected for 5 population based (ancestral informative markers) principal component analysis covariates. After quality control, 123 SNPs remained in the region. Genotype-CpG associations were corrected for multiple testing using stringent Bonferroni-adjusted threshold of 0.05.

### **Genetic association study in the Swedish (SWE) cohort**

Patients from the Swedish (SWE) cohort were genotyped in two different batches at deCODE Genetics using Illumina Human OmniExpress 24 v1 (OE) and Global Screening Array MD 24 v2 (GSA) arrays, following manufacturer's instructions. The cohort was aligned to the forward strand of the hg19 reference genome based on strand information from the Illumina array manifest files. Samples with less than 95% genotyping yield were excluded. Samples with a mismatch between reported and genetic sex were also excluded using a linkage disequilibrium (LD) pruned set of high-quality chromosome X variants. Genetic variants were filtered based on several criteria, including genotype missingness, Hardy-Weinberg Equilibrium (HWE), minor allele frequency (MAF), and differential missingness between cases and controls. Palindromic variants were also filtered based on alternate allele frequency. Individuals with an absolute inbreeding coefficient greater than 0.05 or relatedness at the third degree or closer were excluded. To control for population stratification prior to imputation, Principal Components (PC) were calculated, and outliers were excluded. The Haplotype Reference Consortium (HRC; version 1.1) imputation reference panel 8 was used for phasing and imputation of genotyping data<sup>15</sup>. A total of 7,682,164 autosomal variants passed quality controls.

Starting from these, for the genetic association analysis we extracted all the imputed SNPs ( $n = 3,057$ ) in the extended chr1 locus (from bp 146500000 to bp 147000000). A Principal Component Analysis (PCA) was performed using whole-genome autosomal markers after LD pruning (100 bp window size, 2 bp step, pairwise  $r^2$  threshold of 0.1). The first 8 PC and biological sex were included as covariates in the generalized linear model analysis of SNP-to-phenotype association (PPMS = 603 versus BOMS = 9,247, to account for residual population stratification. The PCA and the association analyses were run separately for individuals genotyped on OE chip and those

genotyped on GSA arrays, to minimize the batch effect exerted by array architecture and potential differences in recruitment of individuals between the two datasets. Subsequently, the results from the two independent association studies were meta-analyzed using fixed-effect and random-effect models as implemented in PLINK. To gain an insight on the underlying genetic structure, we estimated the haplotype blocks in the extended chr1 locus using the largest cohort (OE cohort) as reference on SNPs with MAF  $\geq$  0.05 adopting the standard method integrated in PLINK<sup>16</sup>. Sixty-nine LD blocks were identified and used in a Bonferroni correction to account for multiple testing.

#### **Genetic association study in the Italian (ITA) cohort**

For the Italian cohort, patients were recruited at the Laboratory of Human Genetics of Neurological Disorders at the San Raffaele Scientific Institute in Milan, Italy and genotyped on Illumina platforms. Prior to imputation, we excluded subjects for which sex mismatch, those with call-rate < 90% and outliers exceeding the mean level of heterozygosity by > 3 standard deviations. At variant level, we discarded rare SNPs with MAF < 1%, SNPs with a call-rate < 90% and those departing from HWE at  $p < 10 \times 10^{-6}$ . Imputation was carried out to HRC reference genome<sup>15</sup>. A logistic regression model, as described for the SWE cohort, was used to study the association between the SNPs in the extended chr1 locus and the course of MS in a total of 2,589 patients (PP = 501; BOMS = 2,088). Sex and PC 1 to 8 were used as covariates in the model.

#### **SWE and ITA meta-analysis**

A fixed-effect model meta-analysis of the standard errors of the odds ratio, as implemented in Plink<sup>17</sup>, was applied on the three cohorts. The number of common variants in all the cohorts was 2,676. Multiple testing issue was addressed as described for the SWE cohort.

#### **In-vitro methylation assay**

To address the regulatory features of the identified DMR, we used in-vitro DNA methylation reporter assay. A 927 bp fragment encompassing the identified DMR was amplified using primers containing overhanging *SpeI* and *NsiI* restriction sites (Supplementary Table 12). We used blood genomic DNA from PPMS patients presenting with low (rs1969869: CC) and high (rs1969869: AA) methylation levels at the identified DMR. The amplified products in direct and reverse orientation were inserted into pCpG-free promoter vector (Invivogen) containing a Lucia luciferase reporter and into a pCpG-free basic vector (Invivogen) containing a murine secreted embryonic alkaline phosphatase (mSEAP) reporter gene for assessment of enhancer and promoter activity, respectively. As the body of these vectors is devoid of any CpGs, any impact of DNA methylation on reporter gene expression is restricted to the inserted fragment only. All the constructs were either completely methylated (57 CpGs) using *M.SssI* or partially methylated (7 CpGs residing in the GCGC sequence) by *HhaI* methyltransferases (New England BioLabs) using 1  $\mu$ g of the vectors and 1 unit of the enzymes. The mock methylated control was treated equally but in absence of any methyltransferases and corresponds to unmethylated inserts. After the purification of the methylated, partially- and mock-methylated constructs (QIAquick PCR purification Kit, Qiagen), the efficiency of methylation was assessed using an EpiJET DNA Methylation analysis Kit (*MspI/HpaII*) (ThermoFisher Scientific), followed by gel electrophoresis (Supplementary Fig. 6). Original vectors treated by *M.SssI* and *HhaI* or mock-treated were used as controls. Human embryonic kidney HEK293T cells were cultured in Dulbecco's Modified Eagle's medium in 96 well plates and co-transfected with 90 ng of the Lucia or SEAP constructs and 5 ng of the control vector pGL4-TK-hH Luc constitutively expressing Renilla luciferase, using Lipofectamine 3000 Transfection Reagent (Qiagen). Approximately, 48 hours post transfection, Lucia, SEAP and Renilla activities were measured using QUANTI-Luc (Invivogen), the Phospha-Light System (Applied Biosystems) and the Dual-Glo Luciferase Assay System (Promega), respectively, according to manufacturer's instructions, on the GloMax 96 Microplate Luminometer (Promega). Both direct and reverse orientations of the sequence were tested. Lucia or SEAP signals were normalized against Renilla (triplicate) and experiments were replicated at least two times.

#### **CRISPR/dCas9-TET1 epigenome editing**

*dCas9-TET1 and gRNA generation.* Details and maps of the final constructs used in this study are presented in Supplementary Figure 7. Briefly, we engineered a P3-dCas9-Tet1-GFP-Puro (Addgene #190728) construct as follows. First, to be able to express the gRNAs from the same vector, we mutated the *BbsI* sites in the TET1 sequence (without changing the protein sequence) synthesized by Eurofins (Eurofins MWG Operon Ebersberg, Germany). We then utilized the backbone of a pdCas9-DNMT3A-EGFP plasmid (Addgene #71666)<sup>18</sup> and replaced DNMT3A with TET1 sequence. This cassette was previously engineered to express the original EGFP sequence in a double reporter cassette containing EGFP-T2A-Puromycin under the control of an independent CMV promoter to allow sufficient expression of GFP signal for post-transfection cell sorting. We proceeded similarly with the TET1-IM construct which expresses a deactivated TET1 catalytic unit. The final plasmid expressed dCas9-TET1 (or dCas9-TET1-IM) and CMV-EGFP-T2A-Puromycin double marker unit. All gRNAs were designed by CRISPOR Version 4.98<sup>19</sup> both on the sense and antisense strands, with sequence and mapping presented in the Supplementary Table 12 and Supplementary Fig. 8.

To address dCas9-TET1-mediated epigenome editing in SH-SY5Y cell line, we utilized the lentivirus version of the cassettes. We used Fuw-dCas9-Tet1CD (Addgene #84475) and Fuw-dCas9-Tet1CD\_IM (Addgene #84479) plasmids and added the EGFP marker to facilitate sorting of positively transduced cells (new plasmids named as P3-Lenti-dCas9-Tet1-GFP (Addgene #190729) and P3-Lenti-dCas9-Tet1IM-GFP. We used pKLV2-U6gRNA3(BbsI)-PGKpuro2ABFP (Addgene #67990) to express the gRNA and replaced the BFP with mCherry (named as P3-pKLV2-U6gRNA(BbsI)-PGKpuro2A-mCherry). All constructs were confirmed by Sanger sequencing (KiGene) and chromatograms were analyzed using SnapGene software 5.2.3 (GSLBiotech). Plasmids constructed for this study can be obtained from Addgene.

*dCas9-TET1 delivery to HEK293T and SH-SY5Y cells.* To test the efficiency of epigenome editing, we exploited HEK293T ease of transfection and performed gRNAs screen. Different gRNAs were transfected either individually or in combination based on the target site, using Lipofectamine 3000 (Invitrogen). For all experiments both on HEK293T and SH-SY5Y cells, DNA was extracted after 72 hours and bisulfite conversion was performed using 200 ng of the extracted DNA (BS-DNA, EZ DNA methylation kit, ZYMO research). DNA methylation was assessed using pyrosequencing, as described above. For all experiments conducted on SH-SY5Y cells, we delivered a mix of the two gRNAs that showed the highest efficiency in reducing methylation in HEK293T cells (gRNA #2 and #3).

For the generation of lentiviruses and subsequent transduction of SH-SY5Y cells, HEK293T cells were seeded (~40-50 % confluent) in 2 ml DMEM with 10% serum and 2 mM glutamine per well in 6-well plates. The next day, cells had reached 60-70 % confluency and were co-transfected with transfer plasmids as P3-Lenti-dCas9-Tet1-GFP (Addgene #190729) or P3-Lenti-dCas9-Tet1IM-GFP, as well as P3-pKLV2-U6gRNA(BbsI)-PGKpuro2A-mCherry, psPAX2 (Addgene #12260) and pMD2.G (Addgene #12259) using Lipofectamine 3000 (Invitrogen) transfection reagent as per manufacturer instructions. After overnight incubation, medium was removed, and fresh medium added containing 5% serum and 1X Pen-strep. Cells were further incubated for 48h and 72h post-transfection and the virus containing supernatant collected and centrifuged for 10 mins at 500g to remove any cell debris. The supernatant was concentrated using Lentivirus Precipitation Solution (cat. #VC100; AISTem) according to the manufacturer's instructions and used to transduce SH-SY5Y cells. SH-SY5Y cell line was transduced with virus in complete medium (DMEM with 10% serum and 1X Pen-Strep) containing 8 µg/ml Polybrene (Sigma) with spin infection. Medium was changed 3-4 times to remove any virus residues and cells were used for further assays.

### qPCR analysis

Total RNA and DNA were extracted using AllPrep DNA/RNA Kits (Qiagen) according to the manufacture instruction. RNA and DNA concentrations and quality were verified by QIAxpert (Qiagen). Reverse transcription of RNA was performed using the manufacturer's instructions of



iScript™ cDNA Synthesis Kit (Bio-Rad Laboratories, Inc., CA) with OligodT and Random Hexamer primers, generating cDNA for subsequent gene expression analysis. Real-time PCR was performed on a BioRad CFX384 Touch Real-Time PCR Detection System using iQ™ SYBR® Green Supermix (Bio-Rad Laboratories, Inc., CA) in a three step PCR: 95 °C:3 min, followed by 40 cycles of 95 °C:10 s, 60 °C:30 s and 72 °C:30 s. The relative expressions of the selected genes were normalized to the reference gene *GAPDH*. The specificity of real time PCR reaction was verified by the melt curve analysis. The expression level of selected genes were analyzed using  $\Delta\Delta CT$  method<sup>20</sup> and compared via independent t-test. All statistical analyses were performed in GraphPad Prism 6 and 7 (GraphPad Software).

## Correlation network analysis in MS brain

*Raw data analysis.* The fastq files corresponding to bulk gene expression (RNA-sequencing) data from brain tissue samples of progressive MS patients ( $n_{PPMS} = 5$ ,  $n_{SPMS} = 7$ ) and non-neurological controls ( $n = 10$ )<sup>7,8</sup> were extracted from the RAW RNA sequence files and checked for quality control using multiqc software to make them ready for alignment<sup>21</sup>. After trimming using the trimgalore program<sup>22</sup>, fastqc files were aligned and annotated using STAR aligner and Stringtie software<sup>23</sup> by applying human hg38 refseq information from UCSC. The analysis was performed on the extracted count matrix using bash and Python.

*Network analysis.* In order to utilize a brain-specific network module, we applied a previously established bioinformatic pipeline utilizing co-expression network analysis<sup>24</sup>, as briefly described below. The count matrix was loaded into R(3.6.1) environment and quantile normalized using the glimma package<sup>25</sup>. Spearman correlation is applied on every gene pair and permuted for 10000 times to determine which interactions are significant ( $FDR < 0.05$ ), which avoids biased filtering of the network based on correlation R value. The function also integrates hub connectivity significance for including only the interactions that have significant connectivity in the network. The produced network consisted of 5 million interactions among 27,059 genes, which limits the inherent resolution for defining modules which overlooks the multiscale organization of the network where compact clusters co-exist. In order to overcome this limitation, the correlation network was embedded on a spherical surface, thereby creating a planar maximally filtered network devoid of cross links. The final network consisted of 0.5 million interactions among 27,059 expressed genes from the RNAseq data. The planar maximally filtered graph is then clustered by implementing multiscale clustering algorithm (MCA) from the MEGENA package in R. MCA incorporates three distinct criteria to identify locally coherent clusters while maintaining a globally optimal partition. First, shortest path distances are utilized to optimize within-cluster compactness. Second, local path index is used to optimize local clustering structure. Third, overall modularity is employed to identify optimal partition. The final network clustered into 757 non-overlapping modules.

For the validation data, we applied the same pipeline as described above on several datasets (Supplementary Table 11). In the CUX2<sup>+</sup> neuronal snRNA-seq count data<sup>8</sup>, planar maximal filtration of the Spearman correlated network of 10780 genes was multiscale clustered using the MEGENA package in R. This resulted in 91 modules out of which 1 module with *CHD1L* was significant and was further analyzed with Fisher enrichment test and pathway analysis using clusterProfiler.

*Cluster Trait association analysis.* Principal component analysis (PCA) is first performed for each cluster. Next, correlation between the first principal component and each trait was computed as cluster relevance to the trait. The 757 clusters identified from the correlation network were evaluated for the relevance to PPMS, SPMS and control phenotypes. Three clustered passed  $FDR$   $P$ -value  $< 0.05$ .

## Zebrafish *chd1l* knock-out experiments

*Zebrafish husbandry.* Zebrafish (*Danio rerio*) were raised and maintained as described in<sup>26</sup>. Adult zebrafish were raised in 15 L tanks containing a maximum of 24 individuals, and under a 14 h- 10 h light-dark cycle. The water had a temperature of 28.5 °C and a conductivity of 200 µS and was continuously renewed. The fish were fed three times a day, with dry food and *Artemia salina* larvae. Embryos were raised in E3 medium, at 28.5 °C, under constant darkness. The wild type AB strain, the *chd1*<sup>sa14029</sup> (TL) mutant line (#15474), carrying the mutation C>T at the genomic location Chr6:36844273 (GRCz11), the *Tg(olig2:EGFP)vu12* (AB) (#15211) line were obtained from the European Zebrafish Resource Center. All fish lines reproduce normally, no skewed sex ratio was observed and *chd1* homozygote mutants were recovered in expected Mendelian ratio. All animal experiments were carried out according to the guidelines of the Ethics Committee of IGBMC and ethical approval was obtained from the French Ministry of Higher Education and Research under the number APAFIS#15025-2018041616344504.

*Genotyping of the chd1*<sup>sa14029</sup> *mutant line.* Adult fish were anesthetized in 80 µg/mL tricaine. Fin clips were digested in 50 µL of 50mM NaOH for 15 minutes at 95 °C, and the reaction was neutralized by adding 5 µL of 1M Tris-HCl pH7. The genomic region encompassing the sa19827 mutation was amplified by PCR reaction, using the following primers: 5'-CAGCGTCAGTTTTGCTACCC-3' and 5'-CACCTGGATTGTTCTTGAGC-3'. The PCR product was digested by the Taq α I enzyme, a restriction enzyme whose restriction site is disrupted by the sa14029 mutation. We ran the digestion product on a 2.5% agarose gel for 30 minutes at 135 V. For control *chd1*<sup>+/+</sup>, 2 bands are detected (500 base pairs and 150 base pairs); for heterozygous *chd1*<sup>sa14029/+</sup>, 3 bands are detected (650 base pairs, 500 base pairs and 150 base pairs); and for homozygous *chd1*<sup>sa14029/sa14029</sup> a single 650 base pair-band is detected. In figures and main manuscript, *chd1*<sup>+/-</sup> refers to heterozygous *chd1*<sup>sa14029/+</sup> and *chd1*<sup>-/-</sup> refers to homozygous *chd1*<sup>sa14029/sa14029</sup>.

*Wholmount immunostaining.* Larvae were fixed in Dent's fixative (80% methanol, 20% dimethylsulphoxide [DMSO]) overnight at 4°C. The embryos were permeabilized with proteinase K, then postfixed with 4% PFA and washed in PBSTX (PBS.0.5%, Triton X-100). After rehydration in PBS, PFA-fixed embryos were washed in IF buffer (0.1% Tween-20, 1% BSA in PBS 1X) for 10 min at room temperature. The embryos were incubated in the blocking buffer (10% FBS, 1% BSA in PBS 13) for 1 hr at room temperature. After two washes in IF Buffer for 10 min each, embryos were incubated in the first antibody solution, 1:1,000 anti-acetylated tubulin (T7451, Sigma-Aldrich), in blocking solution, overnight at 4°C. After two washes in IF Buffer for 10 min each, embryos were incubated in the secondary antibody solution, 1:1,000 Alexa Fluor goat anti-mouse IgG (A21207, A11001, Invitrogen), in blocking solution, for 1 hr at room temperature. Images were acquired using MacroFluo ORCA Flash (Leica) system. Maximum projection of Z-stacks was used for further analysis using Fiji.

*Imaging of the oligodendrocyte lineage.* Transgenic *Tg(olig2:EGFP); chd1*<sup>+/+</sup> and *Tg(olig2:EGFP); chd1*<sup>+/-</sup> larvae were raised up to 3 days at 28.5°C and then fixed for 5 hours using paraformaldehyde 4%. Larvae were bleached for pigment removal for 10 minutes in depigmentation solution (3% H<sub>2</sub>O<sub>2</sub>/0.5% KOH) and washed 3 times using PBS-Tween 0.1% before imaging. Fish were imaged dorsally for the head and laterally for the spinal cord. Images of the spinal cord were inverted for easier analysis.

*Statistical analysis.* At least N=3 replicates (one batch of eggs corresponds to one replicate) for each genotype were analyzed. Number of fish per condition is indicated (n). Routh tests were performed using GraphPad Prism v8.0.2.263 for outliers exclusion. When normality and equal variance were validated using Shapiro Test and Bartlett's test, a Student T-test was performed for p-value. If variance were not equal, a Student's T-test with Welch's correction was applied. If normality was not observed, a Wilcoxon T-test was used. GraphPad Prism v8.0.2.263 (GraphPad Software) was used to visualize data as mean ± SEM for at least N=3 replicates per genotype and analysis.

## **iPSC reprogramming and neural differentiation**

Skin biopsies were collected under standardized conditions according to the Regional Ethical Review Boards in Stockholm, Sweden and fibroblast cultures were established, tested negative for mycoplasma and reprogrammed into iPSCs using mRNA reprogramming, as described earlier<sup>27</sup>. iPSC lines were expanded in mTeSR1 media (STEMCELL Technologies) on Matrigel (Corning)-coated plates and purified via magnetic cell sorting (MACS) using Anti-TRA-1-60 MicroBeads (Miltenyi Biotec) according to manufacturer's instructions. Informed consent was obtained from the study participants.

Neural progenitor cells (NPCs) were generated through dual-SMAD pathway inhibition as described earlier. Briefly, 10,000 iPSCs were seeded in V-bottom ultra-low-attachment 96-well plate and cultured for 1 week in embryoid body medium containing Advanced DMEM/F12 (ThermoFisher Scientific) supplemented with dorsomorphin (1  $\mu$ M, Sigma), N-2 (1X, ThermoFisher Scientific), B27 -RA (1X, ThermoFisher Scientific), and SB431542 (5  $\mu$ M, Tocris Bioscience). EBs were then transferred to growth factor reduced Matrigel-coated 6-well plates and cultured for 1 week in media containing DMEM/F12 supplemented with N-2 (1X) and Laminin 521 (1  $\mu$ g/ml, Biolamina) to induce neural rosettes. After 7 days, the rosettes were manually isolated and expanded on growth factor reduced Matrigel-coated 6-well plates in NPC media composed of Neurobasal (ThermoFisher Scientific) and Advanced DMEM/F12 (1:1), supplemented with N-2 (1X), B27 -RA (1X), FGF2 (20 ng/ml, Peprotech), hLIF (10 ng/ml, Peprotech), CHIR99021 (3  $\mu$ M, R&D Systems), SB431541 (2  $\mu$ M) and Y-27632 rock inhibitor (10  $\mu$ M, STEMCELL Technologies). Resulting NPCs were purified with CD271 (Miltenyi Biotec) negative selection followed by CD133 (Miltenyi Biotec) positive selection via MACS.

For neuronal differentiation, NPCs were seeded in either 96- or 24-well plates coated with poly-L-ornithine (10  $\mu$ g/ml) and laminin (5  $\mu$ g/ml) and cultured with NPC media for a day. On the following day, media was replaced with week1 differentiation media consisting of Neurobasal and DMEM/F12 (1:1) supplemented with N-2 (1X), B27 (1X), MEM non-essential amino acids (1X, ThermoFisher), Glutamax (1X, ThermoFisher Scientific), Penicillin-Streptomycin (1X, ThermoFisher Scientific), BDNF (20 ng/ml, Peprotech), GDNF (10ng/ml, Peprotech), ascorbic acid (200uM, STEMCELL Technologies) and cAMP (1  $\mu$ M, Sigma). Week 2 onwards, differentiation media was supplemented with 50% BrainPhys (STEMCELL Technologies) and laminin (1  $\mu$ g/ml) and half-media changes were performed until the end of differentiation (5 weeks).

## **Human iPSC *CHD1L* knock-down experiments**

The Accell human *CHD1L* siRNA SMARTpool and Non-targeting control pool purchased from Dharmacon were freshly supplemented into NPC media or differentiation media at a final concentration of 1  $\mu$ M and maintained throughout the process of neuronal differentiation.

## **Immunocytochemistry**

For immunofluorescence staining of NPCs and forebrain neurons, cells were fixed with 4% paraformaldehyde (Thermo Fisher Scientific) in Phosphate Buffered Saline (PBS) for 15 min at room temperature. Following washing with PBS, the samples were blocked for 1 h at room temperature in blocking solution, consisting of 3% v/v bovine serum albumin (R&D Systems) in 0.3% Triton X-100 in PBS. The samples were then incubated overnight at 4 °C in primary antibody solution (3% BSA in 0.1% Triton X 100) supplemented with antibodies from the following list: anti-SOX1 (1:200 dilution; 4194, Cell Signaling), anti-SOX2 (1:300 dilution; 14-9811-82, ThermoFisher Scientific), anti-PAX6 (1:100 dilution; AB528427, DHSB), anti-MAP2 (1:500 dilution; ab5392,

Abcam) and anti-SYN1 (1:200 dilution; 106 002, Synaptic Systems). After washing thrice with PBS, the cells were incubated for 2 h at room temperature with appropriate secondary antibodies from this list: Goat anti-chicken Alexa Fluor 647 (1:500 dilution; A21449, ThermoFisher Scientific), Goat anti-mouse Alexa Fluor 488 (1:500 dilution; A28175, ThermoFisher Scientific), Goat anti-rabbit Alexa Fluor 555 (1:500 dilution; A21428, ThermoFisher Scientific). The nuclei were counterstained with DAPI (1:1000 dilution; 62248, ThermoFisher Scientific) and the 27 stained samples were mounted using fluorescence mounting medium (S302380-2, Dako). Images of the stained samples were acquired using an LSM-800 confocal laser scanning microscope with a 20x objective equipped with Zeiss Zen (Blue edition) (v2.3) and fluorescence images were processed and analyzed using ImageJ software (v2.0.0).

Branching analysis was performed using the NeuronJ plugin<sup>28</sup>, <http://www.imagescience.org/meijering/software/neuronj/>) in ImageJ to trace primary neurites, defined as MAP2+ branches originating directly from the soma, following the developers' instructions. After tracing was completed, a text file containing neurite count and length measurement data was generated for each neuron traced and a snapshot of the tracings overlaid on the neuron was saved as a TIFF file. For the analysis, 60 neurons were traced for each line.

### **Calcium imaging**

Neuronal cultures (5 weeks) were incubated with the fluorogenic calcium-sensitive dye Cal-520® AM (10 µM, AAT Bioquest) in neural differentiation medium supplemented with 0.04% Pluronic (P3000MP, ThermoFisher Scientific) at 37 °C for 1 h. At the end of the incubation period, the cultures were rinsed thrice with PBS. Spontaneous calcium activity was acquired at a rate of 50 frames/s with exposure time at 20ms for 3 min using a Nikon CrEST X-Light V3 Spinning Disk microscope with a 25x air objective and NIS Elements software. For analysis, files were sub-stacked using ImageJ software to visualize 1 frame every 2s. 10 ROIs per FOV were defined (90-100 cells per condition in each line) and the mean fluorescence intensity for each ROI across time was exported into an excel sheet. The fluorescence change over time was defined as  $\Delta F/F_0 = (F - F_0)/F_0$ , where F is the fluorescence of a ROI at a specific time point and F<sub>0</sub> is the corresponding fluorescence of a background area.

## Supplementary References

- 1 Rao, S. S. *et al.* A 3D map of the human genome at kilobase resolution reveals principles of chromatin looping. *Cell* **159**, 1665-1680 (2014).
- 2 Kular, L. *et al.* Neuronal methylome reveals CREB-associated neuro-axonal impairment in multiple sclerosis. **11**, 1-20 (2019).
- 3 Kular, L. *et al.* DNA methylation changes in glial cells of the normal-appearing white matter in Multiple Sclerosis patients. *Epigenetics* **17**, 1311-1330 (2022).
- 4 Josipović, G. *et al.* Antagonistic and synergistic epigenetic modulation using orthologous CRISPR/dCas9-based modular system. *Nucleic acids research* **47**, 9637-9657 (2019).
- 5 Kular, L. *et al.* DNA methylation as a mediator of HLA-DRB1\*15:01 and a protective variant in multiple sclerosis. *Nat Commun* **9**, 2397, doi:10.1038/s41467-018-04732-5 (2018).
- 6 Hedström, A. K., Hillert, J., Olsson, T. & Alfredsson, L. Smoking and multiple sclerosis susceptibility. *European journal of epidemiology* **28**, 867-874 (2013).
- 7 Huynh, J. L. *et al.* Epigenome-wide differences in pathology-free regions of multiple sclerosis-affected brains. *Nat Neurosci* **17**, 121-130, doi:10.1038/nn.3588 (2014).
- 8 Schirmer, L. *et al.* Neuronal vulnerability and multilineage diversity in multiple sclerosis. *Nature* **573**, 75-82, doi:10.1038/s41586-019-1404-z (2019).
- 9 Ng, B. *et al.* An xQTL map integrates the genetic architecture of the human brain's transcriptome and epigenome. *Nat Neurosci* **20**, 1418-1426, doi:10.1038/nn.4632 (2017).
- 10 Aryee, M. J. *et al.* Minfi: a flexible and comprehensive Bioconductor package for the analysis of Infinium DNA methylation microarrays. *Bioinformatics* **30**, 1363-1369, doi:10.1093/bioinformatics/btu049 (2014).
- 11 Houseman, E. A. *et al.* DNA methylation arrays as surrogate measures of cell mixture distribution. *BMC Bioinformatics* **13**, 86, doi:10.1186/1471-2105-13-86 (2012).
- 12 Jaffe, A. E. *et al.* Mapping DNA methylation across development, genotype and schizophrenia in the human frontal cortex. *Nature neuroscience* **19**, 40-47 (2016).
- 13 Andrews, S. V., Ladd-Acosta, C., Feinberg, A. P., Hansen, K. D. & Fallin, M. D. "Gap hunting" to characterize clustered probe signals in Illumina methylation array data. *Epigenetics & chromatin* **9**, 1-21 (2016).
- 14 Purcell, S. *et al.* PLINK: a tool set for whole-genome association and population-based linkage analyses. *Am J Hum Genet* **81**, 559-575, doi:10.1086/519795 (2007).
- 15 Kretzschmar, W., Mahajan, A., Sharp, K., McCarthy, M. & Consortium, H. R. A reference panel of 64,976 haplotypes for genotype imputation. *Nature Genetics* **48** (2016).
- 16 Gabriel, S. B. *et al.* The structure of haplotype blocks in the human genome. *science* **296**, 2225-2229 (2002).
- 17 Chang, C. C. *et al.* Second-generation PLINK: rising to the challenge of larger and richer datasets. *Gigascience* **4**, s13742-13015-10047-13748 (2015).
- 18 Vojta, A. *et al.* Repurposing the CRISPR-Cas9 system for targeted DNA methylation. *Nucleic Acids Res* **44**, 5615-5628, doi:10.1093/nar/gkw159 (2016).
- 19 Concordet, J. P. & Haeussler, M. CRISPOR: intuitive guide selection for CRISPR/Cas9 genome editing experiments and screens. *Nucleic Acids Res* **46**, W242-W245, doi:10.1093/nar/gky354 (2018).
- 20 Livak, K. J. & Schmittgen, T. D. Analysis of relative gene expression data using real-time quantitative PCR and the 2- $\Delta\Delta$ CT method. *methods* **25**, 402-408 (2001).

- 21 Ewels, P., Magnusson, M., Lundin, S. & Kaller, M. MultiQC: summarize analysis results for multiple tools and samples in a single report. *Bioinformatics* **32**, 3047-3048, doi:10.1093/bioinformatics/btw354 (2016).
- 22 Wu, Z., Wang, X. & Zhang, X. Using non-uniform read distribution models to improve isoform expression inference in RNA-Seq. *Bioinformatics* **27**, 502-508, doi:10.1093/bioinformatics/btq696 (2011).
- 23 Pertea, M. *et al.* StringTie enables improved reconstruction of a transcriptome from RNA-seq reads. *Nat Biotechnol* **33**, 290-295, doi:10.1038/nbt.3122 (2015).
- 24 Song, W.-M. & Zhang, B. Multiscale embedded gene co-expression network analysis. *PLoS computational biology* **11**, e1004574 (2015).
- 25 Su, S. *et al.* Glimma: interactive graphics for gene expression analysis. *Bioinformatics* **33**, 2050-2052, doi:10.1093/bioinformatics/btx094 (2017).
- 26 Whitlock, K. E. & Westerfield, M. The olfactory placodes of the zebrafish form by convergence of cellular fields at the edge of the neural plate. *Development* **127**, 3645-3653 (2000).
- 27 Xu, R. *et al.* Developing human pluripotent stem cell-based cerebral organoids with a controllable microglia ratio for modeling brain development and pathology. **16**, 1923-1937 (2021).
- 28 Meijering, E. *et al.* Design and validation of a tool for neurite tracing and analysis in fluorescence microscopy images. **58**, 167-176 (2004).

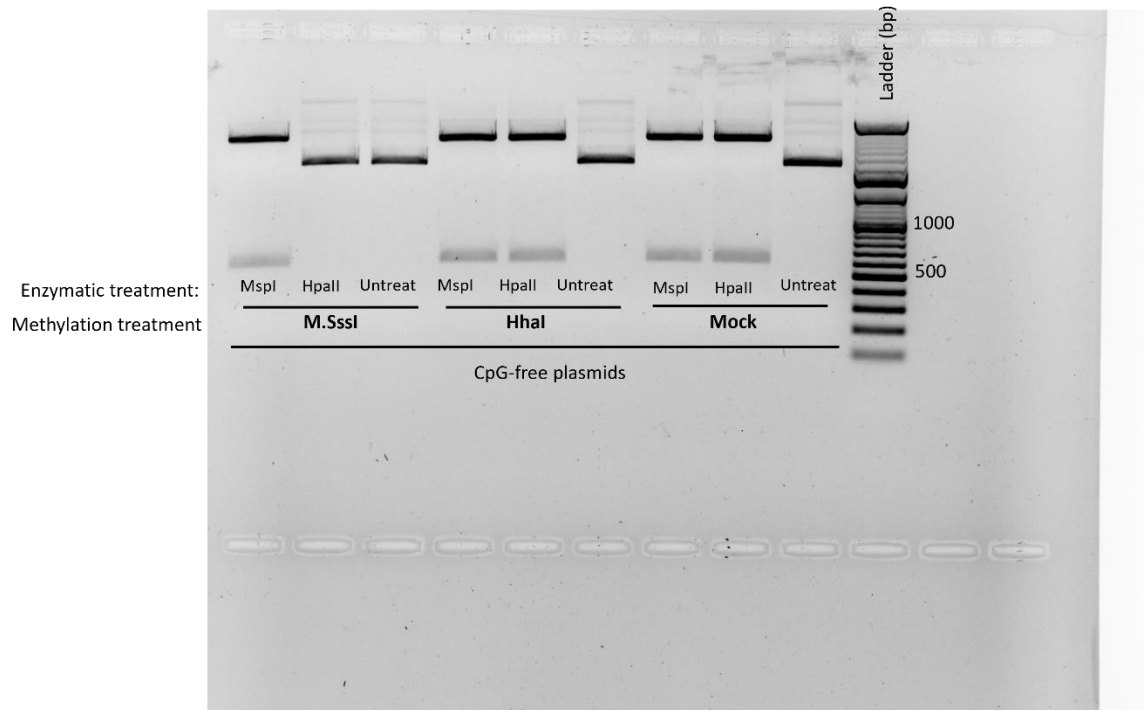

Uncropped scan of the gel used in Supplementary Figure 7.
