# Supplementary material for: A genetic-epigenetic interplay at 1q21.1 locus underlies CHD1L-mediated vulnerability to primary progressive multiple sclerosis
Source: PubMed Central journal article supplement (PMC11289459; doi:10.1038/s41467-024-50794-z), 2024-07-30
Supplement: 41467_2024_50794_MOESM3_ESM.pdf [file 41467_2024_50794_MOESM3_ESM.pdf]

## Description of Additional Supplementary Files

**Supplementary Data 1.** Description of the cohorts

**Supplementary Data 2.** Genome-wide methylation analysis (cohort 1)

**Supplementary Data 3.** Genome-wide meQTL analysis (cohort 1)

**Supplementary Data 4.** Locus-specific meQTL analysis (cohort 2)

**Supplementary Data 5.** Brain meQTL data of the SNPs found to control PPMS-specific DMR methylation at 1q21.1 in blood (xQTL serve database)

**Supplementary Data 6.** Genetic associations ( $P < 0.05$ ) with PPMS vs BOMS in the Swedish cohorts (SWE, cohort 3). RSID in bold are SNPs with significant P-value after Bonferroni correction.

**Supplementary Data 7.** Brain meQTLs and eQTLs for all available SNPs associating with PPMS in the SWE and META (SWE + ITA) (GTEx and xQTL serve databases).

**Supplementary Data 8:** Genetic associations ( $P < 0.05$ ) with PPMS vs BOMS using meta-analysis of the Swedish (SWE) and Italian (ITA) cohorts with concordant effect. RSID in bold are SNPs with significant P-value after Bonferroni correction.

**Supplementary Data 9.** Brain correlation network analysis (RNAseq from Huynh et al., 2014 and snRNA-seq from Schirmer et al., 2019). a. Cluster trait Association. b. Modules. c. Correlations

**Supplementary Data 10.** Gene Ontology analysis (using Ingenuity Pathway Analysis)

**Supplementary Data 11.** Data sets tested for validation of network modules.

**Supplementary Data 12.** Primers sequences
